# Supplementary material for: Predominance of cis-regulatory changes in parallel expression divergence of sticklebacks
Source: eLife journal article supplement (doi:10.7554/elife.43785), 2019-05-15

Little Campbell

cis

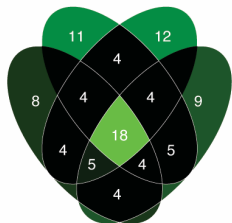

trans

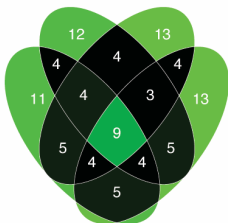

cis+trans

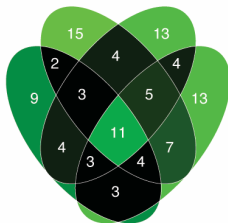

cis-trans

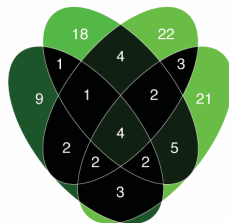

compensatory

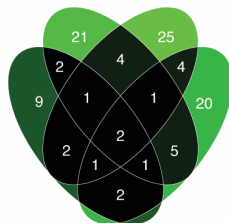

Tyne

cis

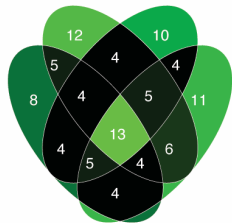

trans

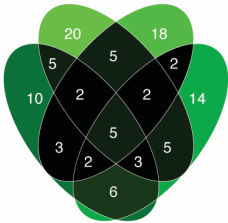

cis+trans

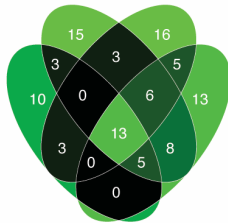

cis-trans

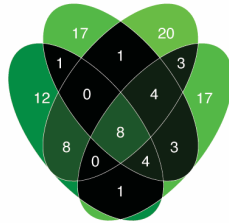

compensatory

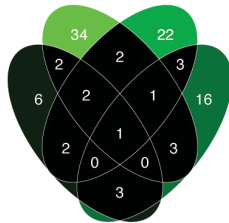

Supplement: supp [file elife-43785-supp-v1.zip]
