# Supplementary material for: Predominance of cis-regulatory changes in parallel expression divergence of sticklebacks
Source: eLife. 2019 May 15;8:e43785. doi: 10.7554/eLife.43785 (PMC6550882; doi:10.7554/eLife.43785)
Supplement: Supplementary file 3. — Available as a supplementary xls file. Two different Gene Ontology analyses were performed using parallel divergent gene expression outliers defined through parametric analysis (CuffDiff) and composite PC analysis (compPC). Gene ontologies with significance lower than 1 × 10−5 shown. [file elife-43785-supp3.xlsx]

## Sheet: README
	Marine and freshwater fish reared in common garden conditions (3.5ppt~=10% seawater) show divergent gene expression profiles.
	Parallel marine-freshwater differentially expressed genes are enriched for:
		biological processes associated with ion transport, ion homeostasis, and g-coupled receptor signaling;
		molecular functions involving transmembrane transport activity;
		and genes in plasma membrane and transmembrane transporter cellular compartments.
	The pages in this spreadsheet correspond to gene ontology enrichment tests performed on different sets of transcripts of interest.
	Enrichment tests were performed on gene lists ranked by:
		Sheets A, B and C	q-value of a Cuffdiff test for differential expression between freshwater and marine ecotypes considering both Little Campbell and Tyne individuals
		Sheets D, E and F	absolute value of composite PC loadings (described in main text)
	We report all GO terms with a value <1x10-5 P<0.05.
	BP	Biological Process
	MF	Molecular Function
	CC	Cellular Compartment

## Sheet: Diff.Exp. BiologicalProcess
	GO Term	Description	P-value	FDR q-value	Enrichment	N	B	n	b	Genes
	GO:0051049	regulation of transport	2.76e-10	3.87e-06	1.59	11315	1295	1027	187	[Ptger3 - prostaglandin e receptor 3 (subtype ep3), Ptger4 - prostaglandin e receptor 4 (subtype ep4), Kcng1 - potassium voltage-gated channel, subfamily g, member 1, Clcn2 - chloride channel 2, Gdnf - glial cell line derived neurotrophic factor, Cyp2j5 - cytochrome p450, family 2, subfamily j, polypeptide 5, Nlgn2 - neuroligin 2, Abcc8 - atp-binding cassette, sub-family c (cftr/mrp), member 8, K…
	GO:0043269	regulation of ion transport	8.87e-10	6.22e-06	2.07	11315	395	1134	82	[Ptger3 - prostaglandin e receptor 3 (subtype ep3), Kcng1 - potassium voltage-gated channel, subfamily g, member 1, Clcn2 - chloride channel 2, Gdnf - glial cell line derived neurotrophic factor, Il1b - interleukin 1 beta, Abcc8 - atp-binding cassette, sub-family c (cftr/mrp), member 8, Agtr2 - angiotensin ii receptor, type 2, Kcnj1 - potassium inwardly-rectifying channel, subfamily j, member 1, …
	GO:0065008	regulation of biological quality	1.74e-09	8.13e-06	1.38	11315	2189	1148	307	[Ptger3 - prostaglandin e receptor 3 (subtype ep3), Ptger4 - prostaglandin e receptor 4 (subtype ep4), Hcrtr2 - hypocretin (orexin) receptor 2, Ptgis - prostaglandin i2 (prostacyclin) synthase, Abhd5 - abhydrolase domain containing 5, Cyp2j5 - cytochrome p450, family 2, subfamily j, polypeptide 5, Abcc8 - atp-binding cassette, sub-family c (cftr/mrp), member 8, Akr1d1 - aldo-keto reductase family…
	GO:0007186	G-protein coupled receptor signaling pathway	2.19e-09	7.69e-06	2.01	11315	435	1100	85	[Jak2 - janus kinase 2, Ptger3 - prostaglandin e receptor 3 (subtype ep3), Arrb1 - arrestin, beta 1, Penk - preproenkephalin, Ptger4 - prostaglandin e receptor 4 (subtype ep4), Hcrtr2 - hypocretin (orexin) receptor 2, Ptgfr - prostaglandin f receptor, Gpr65 - g-protein coupled receptor 65, Gpr112 - g protein-coupled receptor 112, Gprc5c - g protein-coupled receptor, family c, group 5, member c, A…
	GO:0006811	ion transport	1.45e-08	4.06e-05	1.72	11315	769	1036	121	[Ptger3 - prostaglandin e receptor 3 (subtype ep3), Kcng1 - potassium voltage-gated channel, subfamily g, member 1, Slc5a11 - solute carrier family 5 (sodium/glucose cotransporter), member 11, Clcn2 - chloride channel 2, Abcc8 - atp-binding cassette, sub-family c (cftr/mrp), member 8, Kcnj1 - potassium inwardly-rectifying channel, subfamily j, member 1, Slc1a3 - solute carrier family 1 (glial hig…
	GO:0034765	regulation of ion transmembrane transport	7.23e-08	0.000169	2.34	11315	209	1134	49	[Ptger3 - prostaglandin e receptor 3 (subtype ep3), Kcng1 - potassium voltage-gated channel, subfamily g, member 1, Clcn2 - chloride channel 2, Kcnj1 - potassium inwardly-rectifying channel, subfamily j, member 1, Drd1a - dopamine receptor d1a, Slc8a1 - solute carrier family 8 (sodium/calcium exchanger), member 1, Kcna2 - potassium voltage-gated channel, shaker-related subfamily, member 2, Dpp6 -…
	GO:0034762	regulation of transmembrane transport	1.73e-07	0.000347	2.28	11315	214	1134	49	[Ptger3 - prostaglandin e receptor 3 (subtype ep3), Kcng1 - potassium voltage-gated channel, subfamily g, member 1, Clcn2 - chloride channel 2, Kcnj1 - potassium inwardly-rectifying channel, subfamily j, member 1, Drd1a - dopamine receptor d1a, Slc8a1 - solute carrier family 8 (sodium/calcium exchanger), member 1, Kcna2 - potassium voltage-gated channel, shaker-related subfamily, member 2, Dpp6 -…
	GO:0003008	system process	2.15e-07	0.000376	1.58	11315	878	1134	139	[Ptger3 - prostaglandin e receptor 3 (subtype ep3), Aipl1 - aryl hydrocarbon receptor-interacting protein-like 1, Penk - preproenkephalin, Ptger4 - prostaglandin e receptor 4 (subtype ep4), Ar - androgen receptor, Pde6h - phosphodiesterase 6h, cgmp-specific, cone, gamma, Gdnf - glial cell line derived neurotrophic factor, Cyp2j5 - cytochrome p450, family 2, subfamily j, polypeptide 5, Nlgn2 - neu…
	GO:0055082	cellular chemical homeostasis	5.37e-07	0.000837	1.83	11315	435	1138	80	[Jak2 - janus kinase 2, Ptger3 - prostaglandin e receptor 3 (subtype ep3), Gckr - glucokinase regulatory protein, Hcrtr2 - hypocretin (orexin) receptor 2, Trf - transferrin, Gpr65 - g-protein coupled receptor 65, Il1b - interleukin 1 beta, Abcc8 - atp-binding cassette, sub-family c (cftr/mrp), member 8, Agtr2 - angiotensin ii receptor, type 2, P2ry10 - purinergic receptor p2y, g-protein coupled 1…
	GO:0048878	chemical homeostasis	7.2e-07	0.00101	1.66	11315	640	1138	107	[Ptger3 - prostaglandin e receptor 3 (subtype ep3), Hcrtr2 - hypocretin (orexin) receptor 2, Abcc8 - atp-binding cassette, sub-family c (cftr/mrp), member 8, Drd1a - dopamine receptor d1a, Slc26a3 - solute carrier family 26, member 3, Slc8a1 - solute carrier family 8 (sodium/calcium exchanger), member 1, Ckb - creatine kinase, brain, Capn3 - calpain 3, Slc4a2 - solute carrier family 4 (anion exch…
	GO:0042391	regulation of membrane potential	8.2e-07	0.00105	2	11315	301	1148	61	[Nlgn2 - neuroligin 2, Drd1a - dopamine receptor d1a, Slc26a3 - solute carrier family 26, member 3, Slc8a1 - solute carrier family 8 (sodium/calcium exchanger), member 1, Kcna2 - potassium voltage-gated channel, shaker-related subfamily, member 2, Dpp6 - dipeptidylpeptidase 6, Atp1a3 - atpase, na+/k+ transporting, alpha 3 polypeptide, Piezo2 - piezo-type mechanosensitive ion channel component 2, …
	GO:0034220	ion transmembrane transport	8.62e-07	0.00101	1.87	11315	390	1134	73	[Kcng1 - potassium voltage-gated channel, subfamily g, member 1, Trf - transferrin, Kcnj1 - potassium inwardly-rectifying channel, subfamily j, member 1, Slc1a3 - solute carrier family 1 (glial high affinity glutamate transporter), member 3, Slc8a1 - solute carrier family 8 (sodium/calcium exchanger), member 1, Kcna2 - potassium voltage-gated channel, shaker-related subfamily, member 2, Slc25a38 …
	GO:0023061	signal release	8.8e-07	0.000949	2.77	11315	114	1148	32	[Snap91 - synaptosomal-associated protein 91, Snap25 - synaptosomal-associated protein 25, Cadps - ca2+-dependent secretion activator, Agtr2 - angiotensin ii receptor, type 2, Syn3 - synapsin iii, Neurod1 - neurogenic differentiation 1, Syt9 - synaptotagmin ix, Trim9 - tripartite motif-containing 9, Nrxn3 - neurexin iii, Vamp2 - vesicle-associated membrane protein 2, Cartpt - cart prepropeptide, …
	GO:0001505	regulation of neurotransmitter levels	1.07e-06	0.00108	2.33	11315	176	1131	41	[Atp2b2 - atpase, ca++ transporting, plasma membrane 2, Jak2 - janus kinase 2, Ptger4 - prostaglandin e receptor 4 (subtype ep4), Snap91 - synaptosomal-associated protein 91, Ptgis - prostaglandin i2 (prostacyclin) synthase, Gdnf - glial cell line derived neurotrophic factor, Snap25 - synaptosomal-associated protein 25, Ica1 - islet cell autoantigen 1, Btbd9 - btb (poz) domain containing 9, Slc17…
	GO:0043270	positive regulation of ion transport	1.19e-06	0.00111	2.42	11315	157	1134	38	[Atp2b2 - atpase, ca++ transporting, plasma membrane 2, Atp1b2 - atpase, na+/k+ transporting, beta 2 polypeptide, Homer1 - homer homolog 1 (drosophila), Atp1b1 - atpase, na+/k+ transporting, beta 1 polypeptide, Il1b - interleukin 1 beta, Abcc8 - atp-binding cassette, sub-family c (cftr/mrp), member 8, Nos1 - nitric oxide synthase 1, neuronal, Drd1a - dopamine receptor d1a, P2ry2 - purinergic rece…
	GO:0006941	striated muscle contraction	1.27e-06	0.00111	3.55	11315	59	1134	21	[Chrnb1 - cholinergic receptor, nicotinic, beta polypeptide 1 (muscle), Ryr2 - ryanodine receptor 2, cardiac, Kcnh2 - potassium voltage-gated channel, subfamily h (eag-related), member 2, Mybph - myosin binding protein h, Atp1b1 - atpase, na+/k+ transporting, beta 1 polypeptide, Homer1 - homer homolog 1 (drosophila), Csrp3 - cysteine and glycine-rich protein 3, Nos1 - nitric oxide synthase 1, neu…
	GO:0060048	cardiac muscle contraction	1.59e-06	0.00131	4.54	11315	33	1134	15	[Ryr2 - ryanodine receptor 2, cardiac, Kcnh2 - potassium voltage-gated channel, subfamily h (eag-related), member 2, Atp1b1 - atpase, na+/k+ transporting, beta 1 polypeptide, Csrp3 - cysteine and glycine-rich protein 3, Slc8a1 - solute carrier family 8 (sodium/calcium exchanger), member 1, Tnni1 - troponin i, skeletal, slow 1, Myl2 - myosin, light polypeptide 2, regulatory, cardiac, slow, Atp1a3 …
	GO:0019725	cellular homeostasis	1.6e-06	0.00125	1.72	11315	513	1138	89	[Jak2 - janus kinase 2, Ptger3 - prostaglandin e receptor 3 (subtype ep3), Gckr - glucokinase regulatory protein, Hcrtr2 - hypocretin (orexin) receptor 2, Trf - transferrin, Gpr65 - g-protein coupled receptor 65, Il1b - interleukin 1 beta, Abcc8 - atp-binding cassette, sub-family c (cftr/mrp), member 8, Agtr2 - angiotensin ii receptor, type 2, P2ry10 - purinergic receptor p2y, g-protein coupled 1…
	GO:0055085	transmembrane transport	2.25e-06	0.00166	1.7	11315	591	1036	92	[Kcng1 - potassium voltage-gated channel, subfamily g, member 1, Slc5a11 - solute carrier family 5 (sodium/glucose cotransporter), member 11, Clcn2 - chloride channel 2, Trf - transferrin, Slc17a6 - solute carrier family 17 (sodium-dependent inorganic phosphate cotransporter), member 6, Kcnj1 - potassium inwardly-rectifying channel, subfamily j, member 1, Slc1a3 - solute carrier family 1 (glial h…
	GO:0042592	homeostatic process	2.45e-06	0.00172	1.56	11315	914	981	124	[Ptger3 - prostaglandin e receptor 3 (subtype ep3), Aipl1 - aryl hydrocarbon receptor-interacting protein-like 1, Hcrtr2 - hypocretin (orexin) receptor 2, Abcc8 - atp-binding cassette, sub-family c (cftr/mrp), member 8, Kcnj1 - potassium inwardly-rectifying channel, subfamily j, member 1, Slc26a3 - solute carrier family 26, member 3, Ckb - creatine kinase, brain, Capn3 - calpain 3, Slc4a2 - solut…
	GO:0006936	muscle contraction	2.81e-06	0.00188	2.69	11315	115	1134	31	[Ptger3 - prostaglandin e receptor 3 (subtype ep3), Atp1b1 - atpase, na+/k+ transporting, beta 1 polypeptide, Homer1 - homer homolog 1 (drosophila), Gdnf - glial cell line derived neurotrophic factor, Csrp3 - cysteine and glycine-rich protein 3, Nos1 - nitric oxide synthase 1, neuronal, Drd1a - dopamine receptor d1a, Slc8a1 - solute carrier family 8 (sodium/calcium exchanger), member 1, Myl2 - my…
	GO:0050801	ion homeostasis	2.99e-06	0.00191	1.75	11315	467	1138	82	[Jak2 - janus kinase 2, Ptger3 - prostaglandin e receptor 3 (subtype ep3), Hcrtr2 - hypocretin (orexin) receptor 2, Trf - transferrin, Gpr65 - g-protein coupled receptor 65, Il1b - interleukin 1 beta, Agtr2 - angiotensin ii receptor, type 2, P2ry10 - purinergic receptor p2y, g-protein coupled 10, Drd1a - dopamine receptor d1a, Slc26a3 - solute carrier family 26, member 3, P2ry2 - purinergic recep…
	GO:0003012	muscle system process	3.02e-06	0.00184	2.39	11315	150	1134	36	[Ptger3 - prostaglandin e receptor 3 (subtype ep3), Ar - androgen receptor, Homer1 - homer homolog 1 (drosophila), Atp1b1 - atpase, na+/k+ transporting, beta 1 polypeptide, Gdnf - glial cell line derived neurotrophic factor, Csrp3 - cysteine and glycine-rich protein 3, Nos1 - nitric oxide synthase 1, neuronal, Drd1a - dopamine receptor d1a, Gucy1a3 - guanylate cyclase 1, soluble, alpha 3, Slc8a1 …
	GO:0015672	monovalent inorganic cation transport	3.16e-06	0.00185	2.14	11315	222	1094	46	[Kcnq2 - potassium voltage-gated channel, subfamily q, member 2, Kcns1 - k+ voltage-gated channel, subfamily s, 1, Kcng1 - potassium voltage-gated channel, subfamily g, member 1, Kcnk10 - potassium channel, subfamily k, member 10, Hcn3 - hyperpolarization-activated, cyclic nucleotide-gated k+ 3, Slc5a11 - solute carrier family 5 (sodium/glucose cotransporter), member 11, Atp1b2 - atpase, na+/k+ t…
	GO:0098771	inorganic ion homeostasis	3.84e-06	0.00215	1.75	11315	448	1138	79	[Jak2 - janus kinase 2, Ptger3 - prostaglandin e receptor 3 (subtype ep3), Hcrtr2 - hypocretin (orexin) receptor 2, Trf - transferrin, Gpr65 - g-protein coupled receptor 65, Il1b - interleukin 1 beta, Agtr2 - angiotensin ii receptor, type 2, P2ry10 - purinergic receptor p2y, g-protein coupled 10, Drd1a - dopamine receptor d1a, Slc26a3 - solute carrier family 26, member 3, P2ry2 - purinergic recep…
	GO:0032879	regulation of localization	4.77e-06	0.00257	1.35	11315	1849	1037	229	[Ptger3 - prostaglandin e receptor 3 (subtype ep3), Ptger4 - prostaglandin e receptor 4 (subtype ep4), Kcng1 - potassium voltage-gated channel, subfamily g, member 1, Abhd5 - abhydrolase domain containing 5, Cyp2j5 - cytochrome p450, family 2, subfamily j, polypeptide 5, Abcc8 - atp-binding cassette, sub-family c (cftr/mrp), member 8, Capn3 - calpain 3, Derl3 - der1-like domain family, member 3, …
	GO:0098655	cation transmembrane transport	6.37e-06	0.00331	1.97	11315	274	1134	54	[Kcng1 - potassium voltage-gated channel, subfamily g, member 1, Trf - transferrin, Kcnj1 - potassium inwardly-rectifying channel, subfamily j, member 1, Slc1a3 - solute carrier family 1 (glial high affinity glutamate transporter), member 3, Slc8a1 - solute carrier family 8 (sodium/calcium exchanger), member 1, Kcna2 - potassium voltage-gated channel, shaker-related subfamily, member 2, Slc25a38 …
	GO:0010959	regulation of metal ion transport	9.75e-06	0.00489	2.1	11315	217	1094	44	[Atp2b2 - atpase, ca++ transporting, plasma membrane 2, Ptger3 - prostaglandin e receptor 3 (subtype ep3), Atp1b2 - atpase, na+/k+ transporting, beta 2 polypeptide, Mettl21c - methyltransferase like 21c, Homer1 - homer homolog 1 (drosophila), Atp1b1 - atpase, na+/k+ transporting, beta 1 polypeptide, Nos1 - nitric oxide synthase 1, neuronal, Abcc8 - atp-binding cassette, sub-family c (cftr/mrp), m…
	GO:0051480	regulation of cytosolic calcium ion concentration	9.78e-06	0.00473	2.16	11315	189	1138	41	[Atp2b2 - atpase, ca++ transporting, plasma membrane 2, Ptger3 - prostaglandin e receptor 3 (subtype ep3), Jak2 - janus kinase 2, Hcrtr2 - hypocretin (orexin) receptor 2, Gpr4 - g protein-coupled receptor 4, C5ar2 - complement component 5a receptor 2, Gpr65 - g-protein coupled receptor 65, Il1b - interleukin 1 beta, Nos1 - nitric oxide synthase 1, neuronal, Drd1a - dopamine receptor d1a, P2ry10 -…
	GO:0007626	locomotory behavior	9.85e-06	0.0046	2.2	11315	180	1115	39	[Atp2b2 - atpase, ca++ transporting, plasma membrane 2, Penk - preproenkephalin, Snap25 - synaptosomal-associated protein 25, Btbd9 - btb (poz) domain containing 9, Adam22 - a disintegrin and metallopeptidase domain 22, Nlgn2 - neuroligin 2, Sncg - synuclein, gamma, Drd1a - dopamine receptor d1a, Myo15 - myosin xv, Slc6a3 - solute carrier family 6 (neurotransmitter transporter, dopamine), member …

## Sheet: Diff.Exp. MolecularFunction
	GO Term	Description	P-value	FDR q-value	Enrichment	N	B	n	b	Genes
	GO:0005261	cation channel activity	2.27e-10	9.21e-07	2.72	11315	233	909	51	[Kcng1 - potassium voltage-gated channel, subfamily g, member 1, Abcc8 - atp-binding cassette, sub-family c (cftr/mrp), member 8, Kcnj1 - potassium inwardly-rectifying channel, subfamily j, member 1, Kcna2 - potassium voltage-gated channel, shaker-related subfamily, member 2, Kcnab1 - potassium voltage-gated channel, shaker-related subfamily, beta member 1, Piezo2 - piezo-type mechanosensitive io…
	GO:0022838	substrate-specific channel activity	3.22e-10	6.55e-07	2.47	11315	302	909	60	[Kcng1 - potassium voltage-gated channel, subfamily g, member 1, Clcn2 - chloride channel 2, Abcc8 - atp-binding cassette, sub-family c (cftr/mrp), member 8, Kcnj1 - potassium inwardly-rectifying channel, subfamily j, member 1, Slc26a3 - solute carrier family 26, member 3, Kcna2 - potassium voltage-gated channel, shaker-related subfamily, member 2, Kcnab1 - potassium voltage-gated channel, shaker…
	GO:0022803	passive transmembrane transporter activity	3.46e-10	4.69e-07	2.43	11315	318	909	62	[Kcng1 - potassium voltage-gated channel, subfamily g, member 1, Clcn2 - chloride channel 2, Abcc8 - atp-binding cassette, sub-family c (cftr/mrp), member 8, Kcnj1 - potassium inwardly-rectifying channel, subfamily j, member 1, Slc26a3 - solute carrier family 26, member 3, Kcna2 - potassium voltage-gated channel, shaker-related subfamily, member 2, Prf1 - perforin 1 (pore forming protein), Kcnab1…
	GO:0015267	channel activity	3.46e-10	3.52e-07	2.43	11315	318	909	62	[Kcng1 - potassium voltage-gated channel, subfamily g, member 1, Clcn2 - chloride channel 2, Abcc8 - atp-binding cassette, sub-family c (cftr/mrp), member 8, Kcnj1 - potassium inwardly-rectifying channel, subfamily j, member 1, Slc26a3 - solute carrier family 26, member 3, Kcna2 - potassium voltage-gated channel, shaker-related subfamily, member 2, Prf1 - perforin 1 (pore forming protein), Kcnab1…
	GO:0005216	ion channel activity	4.08e-10	3.32e-07	2.48	11315	296	909	59	[Kcng1 - potassium voltage-gated channel, subfamily g, member 1, Clcn2 - chloride channel 2, Abcc8 - atp-binding cassette, sub-family c (cftr/mrp), member 8, Kcnj1 - potassium inwardly-rectifying channel, subfamily j, member 1, Slc26a3 - solute carrier family 26, member 3, Kcna2 - potassium voltage-gated channel, shaker-related subfamily, member 2, Kcnab1 - potassium voltage-gated channel, shaker…
	GO:0015318	inorganic molecular entity transmembrane transporter activity	2.66e-09	1.8e-06	1.87	11315	538	1134	101	[Kcng1 - potassium voltage-gated channel, subfamily g, member 1, Slc5a11 - solute carrier family 5 (sodium/glucose cotransporter), member 11, Clcn2 - chloride channel 2, Abcc8 - atp-binding cassette, sub-family c (cftr/mrp), member 8, Kcnj1 - potassium inwardly-rectifying channel, subfamily j, member 1, Slc1a3 - solute carrier family 1 (glial high affinity glutamate transporter), member 3, Slc26a…
	GO:0022836	gated channel activity	3.11e-09	1.81e-06	2.57	11315	242	909	50	[Kcng1 - potassium voltage-gated channel, subfamily g, member 1, Clcn2 - chloride channel 2, Kcnj1 - potassium inwardly-rectifying channel, subfamily j, member 1, Kcna2 - potassium voltage-gated channel, shaker-related subfamily, member 2, Kcnab1 - potassium voltage-gated channel, shaker-related subfamily, beta member 1, Piezo2 - piezo-type mechanosensitive ion channel component 2, Chrna7 - choli…
	GO:0008381	mechanosensitive ion channel activity	3.11e-09	1.58e-06	2.57	11315	242	909	50	[Kcng1 - potassium voltage-gated channel, subfamily g, member 1, Clcn2 - chloride channel 2, Kcnj1 - potassium inwardly-rectifying channel, subfamily j, member 1, Kcna2 - potassium voltage-gated channel, shaker-related subfamily, member 2, Kcnab1 - potassium voltage-gated channel, shaker-related subfamily, beta member 1, Piezo2 - piezo-type mechanosensitive ion channel component 2, Chrna7 - choli…
	GO:0008324	cation transmembrane transporter activity	4.65e-09	2.1e-06	1.96	11315	443	1134	87	[Kcng1 - potassium voltage-gated channel, subfamily g, member 1, Slc5a11 - solute carrier family 5 (sodium/glucose cotransporter), member 11, Trf - transferrin, Slc25a15 - solute carrier family 25 (mitochondrial carrier ornithine transporter), member 15, Abcc8 - atp-binding cassette, sub-family c (cftr/mrp), member 8, Kcnj1 - potassium inwardly-rectifying channel, subfamily j, member 1, Slc1a3 - …
	GO:0022839	ion gated channel activity	6.54e-09	2.66e-06	2.55	11315	240	907	49	[Kcng1 - potassium voltage-gated channel, subfamily g, member 1, Clcn2 - chloride channel 2, Kcnj1 - potassium inwardly-rectifying channel, subfamily j, member 1, Kcna2 - potassium voltage-gated channel, shaker-related subfamily, member 2, Kcnab1 - potassium voltage-gated channel, shaker-related subfamily, beta member 1, Chrna7 - cholinergic receptor, nicotinic, alpha polypeptide 7, Gria3 - gluta…
	GO:0015075	ion transmembrane transporter activity	1.82e-08	6.71e-06	1.82	11315	587	1058	100	[Kcng1 - potassium voltage-gated channel, subfamily g, member 1, Slc5a11 - solute carrier family 5 (sodium/glucose cotransporter), member 11, Clcn2 - chloride channel 2, Abcc8 - atp-binding cassette, sub-family c (cftr/mrp), member 8, Kcnj1 - potassium inwardly-rectifying channel, subfamily j, member 1, Slc1a3 - solute carrier family 1 (glial high affinity glutamate transporter), member 3, Slc26a…
	GO:0140135	mechanosensitive cation channel activity	4.62e-08	1.57e-05	2.72	11315	180	902	39	[Kcnq2 - potassium voltage-gated channel, subfamily q, member 2, Kcns1 - k+ voltage-gated channel, subfamily s, 1, Kcng1 - potassium voltage-gated channel, subfamily g, member 1, Hcn3 - hyperpolarization-activated, cyclic nucleotide-gated k+ 3, Snap25 - synaptosomal-associated protein 25, Kcnj1 - potassium inwardly-rectifying channel, subfamily j, member 1, Kcna2 - potassium voltage-gated channel…
	GO:0022857	transmembrane transporter activity	1.08e-07	3.39e-05	1.71	11315	696	1058	111	[Kcng1 - potassium voltage-gated channel, subfamily g, member 1, Slc5a11 - solute carrier family 5 (sodium/glucose cotransporter), member 11, Clcn2 - chloride channel 2, Abcc8 - atp-binding cassette, sub-family c (cftr/mrp), member 8, Kcnj1 - potassium inwardly-rectifying channel, subfamily j, member 1, Slc1a3 - solute carrier family 1 (glial high affinity glutamate transporter), member 3, Slc26a…
	GO:0046873	metal ion transmembrane transporter activity	3.73e-07	0.000108	2	11315	319	1134	64	[Kcng1 - potassium voltage-gated channel, subfamily g, member 1, Slc5a11 - solute carrier family 5 (sodium/glucose cotransporter), member 11, Trf - transferrin, Abcc8 - atp-binding cassette, sub-family c (cftr/mrp), member 8, Kcnj1 - potassium inwardly-rectifying channel, subfamily j, member 1, Slc1a3 - solute carrier family 1 (glial high affinity glutamate transporter), member 3, Slc8a1 - solute…
	GO:0038023	signaling receptor activity	7.12e-07	0.000193	1.72	11315	568	1099	95	[Ptger3 - prostaglandin e receptor 3 (subtype ep3), Ahr - aryl-hydrocarbon receptor, Ptger4 - prostaglandin e receptor 4 (subtype ep4), Hcrtr2 - hypocretin (orexin) receptor 2, Ptgfr - prostaglandin f receptor, Ar - androgen receptor, Gpr65 - g-protein coupled receptor 65, Il17re - interleukin 17 receptor e, Esrrg - estrogen-related receptor gamma, Gpr112 - g protein-coupled receptor 112, Gprc5c …
	GO:0015077	monovalent inorganic cation transmembrane transporter activity	7.41e-07	0.000188	2.12	11315	259	1094	53	[Kcng1 - potassium voltage-gated channel, subfamily g, member 1, Slc5a11 - solute carrier family 5 (sodium/glucose cotransporter), member 11, Abcc8 - atp-binding cassette, sub-family c (cftr/mrp), member 8, Kcnj1 - potassium inwardly-rectifying channel, subfamily j, member 1, Slc1a3 - solute carrier family 1 (glial high affinity glutamate transporter), member 3, Slc8a1 - solute carrier family 8 (…
	GO:0022834	ligand-gated channel activity	1.49e-06	0.000356	3.14	11315	106	883	26	[Gabra5 - gamma-aminobutyric acid (gaba) a receptor, subunit alpha 5, Kcnj1 - potassium inwardly-rectifying channel, subfamily j, member 1, Gabrr1 - gamma-aminobutyric acid (gaba) c receptor, subunit rho 1, Gabrb3 - gamma-aminobutyric acid (gaba) a receptor, subunit beta 3, P2rx2 - purinergic receptor p2x, ligand-gated ion channel, 2, Gabrb1 - gamma-aminobutyric acid (gaba) a receptor, subunit be…
	GO:0015276	ligand-gated ion channel activity	1.49e-06	0.000337	3.14	11315	106	883	26	[Gabra5 - gamma-aminobutyric acid (gaba) a receptor, subunit alpha 5, Kcnj1 - potassium inwardly-rectifying channel, subfamily j, member 1, Gabrr1 - gamma-aminobutyric acid (gaba) c receptor, subunit rho 1, Gabrb3 - gamma-aminobutyric acid (gaba) a receptor, subunit beta 3, P2rx2 - purinergic receptor p2x, ligand-gated ion channel, 2, Gabrb1 - gamma-aminobutyric acid (gaba) a receptor, subunit be…
	GO:0099600	transmembrane receptor activity	2.32e-06	0.000496	1.75	11315	495	1099	84	[Ptger3 - prostaglandin e receptor 3 (subtype ep3), Ptger4 - prostaglandin e receptor 4 (subtype ep4), Ptgfr - prostaglandin f receptor, Hcrtr2 - hypocretin (orexin) receptor 2, Gpr65 - g-protein coupled receptor 65, Il17re - interleukin 17 receptor e, Gpr112 - g protein-coupled receptor 112, Gprc5c - g protein-coupled receptor, family c, group 5, member c, Agtr2 - angiotensin ii receptor, type 2…
	GO:0004888	transmembrane signaling receptor activity	2.32e-06	0.000472	1.75	11315	495	1099	84	[Ptger3 - prostaglandin e receptor 3 (subtype ep3), Ptger4 - prostaglandin e receptor 4 (subtype ep4), Hcrtr2 - hypocretin (orexin) receptor 2, Ptgfr - prostaglandin f receptor, Gpr65 - g-protein coupled receptor 65, Il17re - interleukin 17 receptor e, Gpr112 - g protein-coupled receptor 112, Gprc5c - g protein-coupled receptor, family c, group 5, member c, Agtr2 - angiotensin ii receptor, type 2…
	GO:0005215	transporter activity	2.37e-06	0.000459	1.57	11315	830	1058	122	[Gltpd2 - glycolipid transfer protein domain containing 2, Kcng1 - potassium voltage-gated channel, subfamily g, member 1, Slc5a11 - solute carrier family 5 (sodium/glucose cotransporter), member 11, Clcn2 - chloride channel 2, Abcc8 - atp-binding cassette, sub-family c (cftr/mrp), member 8, Kcnj1 - potassium inwardly-rectifying channel, subfamily j, member 1, Slc1a3 - solute carrier family 1 (gl…
	GO:0004872	receptor activity	2.38e-06	0.000439	1.62	11315	665	1122	107	[Ptger3 - prostaglandin e receptor 3 (subtype ep3), Ptger4 - prostaglandin e receptor 4 (subtype ep4), Hcrtr2 - hypocretin (orexin) receptor 2, Ptgfr - prostaglandin f receptor, Ar - androgen receptor, Gpr112 - g protein-coupled receptor 112, Esrrg - estrogen-related receptor gamma, Gprc5c - g protein-coupled receptor, family c, group 5, member c, Nlgn2 - neuroligin 2, Drd1a - dopamine receptor d…
	GO:0022890	inorganic cation transmembrane transporter activity	2.9e-06	0.000512	1.84	11315	380	1134	70	[Kcng1 - potassium voltage-gated channel, subfamily g, member 1, Slc5a11 - solute carrier family 5 (sodium/glucose cotransporter), member 11, Trf - transferrin, Abcc8 - atp-binding cassette, sub-family c (cftr/mrp), member 8, Kcnj1 - potassium inwardly-rectifying channel, subfamily j, member 1, Slc1a3 - solute carrier family 1 (glial high affinity glutamate transporter), member 3, Slc8a1 - solute…
	GO:0015079	potassium ion transmembrane transporter activity	3.37e-06	0.000571	2.59	11315	132	1094	33	[Kcnq2 - potassium voltage-gated channel, subfamily q, member 2, Kcns1 - k+ voltage-gated channel, subfamily s, 1, Kcng1 - potassium voltage-gated channel, subfamily g, member 1, Hcn3 - hyperpolarization-activated, cyclic nucleotide-gated k+ 3, Kcnk10 - potassium channel, subfamily k, member 10, Atp1b2 - atpase, na+/k+ transporting, beta 2 polypeptide, Atp1b1 - atpase, na+/k+ transporting, beta 1…
	GO:0060089	molecular transducer activity	4.67e-06	0.000759	1.59	11315	697	1122	110	[Ptger3 - prostaglandin e receptor 3 (subtype ep3), Ptger4 - prostaglandin e receptor 4 (subtype ep4), Hcrtr2 - hypocretin (orexin) receptor 2, Ptgfr - prostaglandin f receptor, Ar - androgen receptor, Gpr112 - g protein-coupled receptor 112, Esrrg - estrogen-related receptor gamma, Gprc5c - g protein-coupled receptor, family c, group 5, member c, Nlgn2 - neuroligin 2, Drd1a - dopamine receptor d…
	GO:0004871	signal transducer activity	4.88e-06	0.000763	1.59	11315	760	1029	110	[Ptger3 - prostaglandin e receptor 3 (subtype ep3), Ptger4 - prostaglandin e receptor 4 (subtype ep4), Ptgfr - prostaglandin f receptor, Hcrtr2 - hypocretin (orexin) receptor 2, Ar - androgen receptor, Gpr112 - g protein-coupled receptor 112, Esrrg - estrogen-related receptor gamma, Mapkapk2 - map kinase-activated protein kinase 2, Drd1a - dopamine receptor d1a, Nrg2 - neuregulin 2, Axl - axl rec…
	GO:0030594	neurotransmitter receptor activity	5.56e-06	0.000837	3.34	11315	70	1017	21	[Chrna7 - cholinergic receptor, nicotinic, alpha polypeptide 7, Chrnb1 - cholinergic receptor, nicotinic, beta polypeptide 1 (muscle), Gria3 - glutamate receptor, ionotropic, ampa3 (alpha 3), Gabbr2 - gamma-aminobutyric acid (gaba) b receptor, 2, Gpr21 - g protein-coupled receptor 21, Chrnb2 - cholinergic receptor, nicotinic, beta polypeptide 2 (neuronal), Tspo - translocator protein, Drd1a - dop…
	GO:0004930	G-protein coupled receptor activity	7.12e-06	0.00103	1.99	11315	269	1099	52	[Ptger3 - prostaglandin e receptor 3 (subtype ep3), Ptger4 - prostaglandin e receptor 4 (subtype ep4), Hcrtr2 - hypocretin (orexin) receptor 2, Ptgfr - prostaglandin f receptor, Gpr65 - g-protein coupled receptor 65, Gpr112 - g protein-coupled receptor 112, Gprc5c - g protein-coupled receptor, family c, group 5, member c, Agtr2 - angiotensin ii receptor, type 2, Drd1a - dopamine receptor d1a, P2r…
	GO:0005230	extracellular ligand-gated ion channel activity	9.46e-06	0.00133	3.45	11315	59	1057	19	[Chrna7 - cholinergic receptor, nicotinic, alpha polypeptide 7, Gria3 - glutamate receptor, ionotropic, ampa3 (alpha 3), Chrnb1 - cholinergic receptor, nicotinic, beta polypeptide 1 (muscle), Chrnb2 - cholinergic receptor, nicotinic, beta polypeptide 2 (neuronal), P2rx3 - purinergic receptor p2x, ligand-gated ion channel, 3, Gabra5 - gamma-aminobutyric acid (gaba) a receptor, subunit alpha 5, P2r…

## Sheet: Diff.Exp. CellularComponent
	GO Term	Description	P-value	FDR q-value	Enrichment	N	B	n	b	Genes
	GO:0044459	plasma membrane part	4.04e-17	7.11e-14	1.68	11315	1574	1148	269	[Cldn13 - claudin 13, Ptger3 - prostaglandin e receptor 3 (subtype ep3), Hcrtr2 - hypocretin (orexin) receptor 2, Kcng1 - potassium voltage-gated channel, subfamily g, member 1, Ptgis - prostaglandin i2 (prostacyclin) synthase, Mr1 - major histocompatibility complex, class i-related, Abcc8 - atp-binding cassette, sub-family c (cftr/mrp), member 8, Fscn1 - fascin homolog 1, actin bundling protein …
	GO:0005886	plasma membrane	1.22e-13	1.07e-10	1.45	11315	2532	1148	373	[Ptger3 - prostaglandin e receptor 3 (subtype ep3), Cldn13 - claudin 13, Ptger4 - prostaglandin e receptor 4 (subtype ep4), Ptgfr - prostaglandin f receptor, Hcrtr2 - hypocretin (orexin) receptor 2, Pcdh20 - protocadherin 20, Kcng1 - potassium voltage-gated channel, subfamily g, member 1, Mr1 - major histocompatibility complex, class i-related, Gprc5c - g protein-coupled receptor, family c, group…
	GO:1902495	transmembrane transporter complex	1.14e-12	6.67e-10	2.73	11315	223	1134	61	[Shank2 - sh3/ankyrin domain gene 2, Kcng1 - potassium voltage-gated channel, subfamily g, member 1, Clcn2 - chloride channel 2, Abcc8 - atp-binding cassette, sub-family c (cftr/mrp), member 8, Cntnap2 - contactin associated protein-like 2, Kcna2 - potassium voltage-gated channel, shaker-related subfamily, member 2, Dpp6 - dipeptidylpeptidase 6, Atp1a3 - atpase, na+/k+ transporting, alpha 3 polyp…
	GO:1990351	transporter complex	2.66e-12	1.17e-09	2.68	11315	227	1134	61	[Shank2 - sh3/ankyrin domain gene 2, Kcng1 - potassium voltage-gated channel, subfamily g, member 1, Clcn2 - chloride channel 2, Abcc8 - atp-binding cassette, sub-family c (cftr/mrp), member 8, Cntnap2 - contactin associated protein-like 2, Kcna2 - potassium voltage-gated channel, shaker-related subfamily, member 2, Dpp6 - dipeptidylpeptidase 6, Atp1a3 - atpase, na+/k+ transporting, alpha 3 polyp…
	GO:0034702	ion channel complex	8.16e-12	2.87e-09	2.72	11315	209	1134	57	[Shank2 - sh3/ankyrin domain gene 2, Kcng1 - potassium voltage-gated channel, subfamily g, member 1, Clcn2 - chloride channel 2, Abcc8 - atp-binding cassette, sub-family c (cftr/mrp), member 8, Cntnap2 - contactin associated protein-like 2, Kcna2 - potassium voltage-gated channel, shaker-related subfamily, member 2, Dpp6 - dipeptidylpeptidase 6, Kcnab1 - potassium voltage-gated channel, shaker-re…
	GO:0098590	plasma membrane region	2.17e-11	6.35e-09	1.83	11315	710	1148	132	[Ptger3 - prostaglandin e receptor 3 (subtype ep3), Ptgis - prostaglandin i2 (prostacyclin) synthase, Nlgn2 - neuroligin 2, Cldn3 - claudin 3, Cldn5 - claudin 5, Drd1a - dopamine receptor d1a, Slc1a3 - solute carrier family 1 (glial high affinity glutamate transporter), member 3, Fscn1 - fascin homolog 1, actin bundling protein (strongylocentrotus purpuratus), Slc26a3 - solute carrier family 26, …
	GO:0044456	synapse part	4.87e-11	1.22e-08	1.89	11315	626	1116	117	[Penk - preproenkephalin, Nlgn2 - neuroligin 2, Abcc8 - atp-binding cassette, sub-family c (cftr/mrp), member 8, Drd1a - dopamine receptor d1a, Slc1a3 - solute carrier family 1 (glial high affinity glutamate transporter), member 3, Cntnap2 - contactin associated protein-like 2, Slc8a1 - solute carrier family 8 (sodium/calcium exchanger), member 1, Fus - fused in sarcoma, Nrxn3 - neurexin iii, Slc…
	GO:0034703	cation channel complex	8.74e-11	1.92e-08	2.95	11315	152	1134	45	[Kcnq2 - potassium voltage-gated channel, subfamily q, member 2, Kcns1 - k+ voltage-gated channel, subfamily s, 1, Kcng1 - potassium voltage-gated channel, subfamily g, member 1, Snap25 - synaptosomal-associated protein 25, Abcc8 - atp-binding cassette, sub-family c (cftr/mrp), member 8, Cntnap2 - contactin associated protein-like 2, Dlg4 - discs, large homolog 4 (drosophila), Kcna2 - potassium v…
	GO:0043005	neuron projection	2.16e-10	4.22e-08	1.7	11315	881	1150	152	[Ptger3 - prostaglandin e receptor 3 (subtype ep3), Penk - preproenkephalin, Ar - androgen receptor, Clcn2 - chloride channel 2, Fscn1 - fascin homolog 1, actin bundling protein (strongylocentrotus purpuratus), Drd1a - dopamine receptor d1a, Slc1a3 - solute carrier family 1 (glial high affinity glutamate transporter), member 3, Cntnap2 - contactin associated protein-like 2, Slc8a1 - solute carrie…
	GO:0097458	neuron part	5.07e-10	8.91e-08	1.54	11315	1308	1150	205	[Ptger3 - prostaglandin e receptor 3 (subtype ep3), Ptger4 - prostaglandin e receptor 4 (subtype ep4), Abcc8 - atp-binding cassette, sub-family c (cftr/mrp), member 8, Fscn1 - fascin homolog 1, actin bundling protein (strongylocentrotus purpuratus), Cntnap2 - contactin associated protein-like 2, Slc6a3 - solute carrier family 6 (neurotransmitter transporter, dopamine), member 3, Nrxn3 - neurexin …
	GO:0031224	intrinsic component of membrane	1.84e-08	2.94e-06	1.3	11315	2908	1125	376	[Ptger3 - prostaglandin e receptor 3 (subtype ep3), Cldn13 - claudin 13, Ptger4 - prostaglandin e receptor 4 (subtype ep4), Ptgfr - prostaglandin f receptor, Hcrtr2 - hypocretin (orexin) receptor 2, Pcdh20 - protocadherin 20, Kcng1 - potassium voltage-gated channel, subfamily g, member 1, Mr1 - major histocompatibility complex, class i-related, Ptgis - prostaglandin i2 (prostacyclin) synthase, Xk…
	GO:0016020	membrane	3.96e-08	5.8e-06	1.2	11315	4938	1030	541	[Cldn13 - claudin 13, Ptger3 - prostaglandin e receptor 3 (subtype ep3), Ptger4 - prostaglandin e receptor 4 (subtype ep4), Hcrtr2 - hypocretin (orexin) receptor 2, Ptgfr - prostaglandin f receptor, Mr1 - major histocompatibility complex, class i-related, Ptgis - prostaglandin i2 (prostacyclin) synthase, Cyp2j5 - cytochrome p450, family 2, subfamily j, polypeptide 5, Gpr112 - g protein-coupled re…
	GO:0033267	axon part	3.99e-08	5.39e-06	2.44	11315	206	1056	47	[Kcnq2 - potassium voltage-gated channel, subfamily q, member 2, Snap91 - synaptosomal-associated protein 91, Snap25 - synaptosomal-associated protein 25, Slc17a6 - solute carrier family 17 (sodium-dependent inorganic phosphate cotransporter), member 6, Limk1 - lim-domain containing, protein kinase, Mapk8ip1 - mitogen-activated protein kinase 8 interacting protein 1, Cntnap2 - contactin associate…
	GO:0120025	plasma membrane bounded cell projection	4.99e-08	6.26e-06	1.5	11315	1229	1150	187	[Ptger3 - prostaglandin e receptor 3 (subtype ep3), Penk - preproenkephalin, Ar - androgen receptor, Clcn2 - chloride channel 2, Fscn1 - fascin homolog 1, actin bundling protein (strongylocentrotus purpuratus), Slc1a3 - solute carrier family 1 (glial high affinity glutamate transporter), member 3, Drd1a - dopamine receptor d1a, Cntnap2 - contactin associated protein-like 2, Slc8a1 - solute carrie…
	GO:0005576	extracellular region	5.33e-08	6.25e-06	1.62	11315	841	1137	137	[Rln3 - relaxin 3, Penk - preproenkephalin, Gdnf - glial cell line derived neurotrophic factor, Ovch2 - ovochymase 2, C1qtnf4 - c1q and tumor necrosis factor related protein 4, Prf1 - perforin 1 (pore forming protein), Adam23 - a disintegrin and metallopeptidase domain 23, Chia - chitinase, acidic, Ccdc3 - coiled-coil domain containing 3, Nppc - natriuretic peptide type c, Papl - iron/zinc purple…
	GO:0044425	membrane part	5.7e-08	6.27e-06	1.24	11315	3751	1125	463	[Cldn13 - claudin 13, Ptger3 - prostaglandin e receptor 3 (subtype ep3), Ptger4 - prostaglandin e receptor 4 (subtype ep4), Hcrtr2 - hypocretin (orexin) receptor 2, Ptgfr - prostaglandin f receptor, Mr1 - major histocompatibility complex, class i-related, Ptgis - prostaglandin i2 (prostacyclin) synthase, Gpr112 - g protein-coupled receptor 112, Gprc5c - g protein-coupled receptor, family c, group…
	GO:0097060	synaptic membrane	8.32e-08	8.61e-06	2.15	11315	272	1140	59	[Shank2 - sh3/ankyrin domain gene 2, Arrb1 - arrestin, beta 1, Nlgn2 - neuroligin 2, Eno2 - enolase 2, gamma neuronal, Cntnap2 - contactin associated protein-like 2, Slc8a1 - solute carrier family 8 (sodium/calcium exchanger), member 1, Lrfn2 - leucine rich repeat and fibronectin type iii domain containing 2, Gabbr1 - gamma-aminobutyric acid (gaba) b receptor, 1, Lrrtm1 - leucine rich repeat tran…
	GO:0045202	synapse	8.6e-08	8.4e-06	1.82	11315	492	1148	91	[Shank2 - sh3/ankyrin domain gene 2, Penk - preproenkephalin, Nf2 - neurofibromatosis 2, Nmnat2 - nicotinamide nucleotide adenylyltransferase 2, Slc17a6 - solute carrier family 17 (sodium-dependent inorganic phosphate cotransporter), member 6, Nlgn2 - neuroligin 2, Slc1a3 - solute carrier family 1 (glial high affinity glutamate transporter), member 3, Kcna2 - potassium voltage-gated channel, shak…
	GO:0016021	integral component of membrane	1.14e-07	1.05e-05	1.3	11315	2822	1099	355	[Ptger3 - prostaglandin e receptor 3 (subtype ep3), Cldn13 - claudin 13, Ptger4 - prostaglandin e receptor 4 (subtype ep4), Ptgfr - prostaglandin f receptor, Hcrtr2 - hypocretin (orexin) receptor 2, Pcdh20 - protocadherin 20, Kcng1 - potassium voltage-gated channel, subfamily g, member 1, Mr1 - major histocompatibility complex, class i-related, Ptgis - prostaglandin i2 (prostacyclin) synthase, Xk…
	GO:0120038	plasma membrane bounded cell projection part	1.19e-07	1.04e-05	1.52	11315	1080	1150	167	[Ptger3 - prostaglandin e receptor 3 (subtype ep3), Penk - preproenkephalin, Ptger4 - prostaglandin e receptor 4 (subtype ep4), Ar - androgen receptor, Clcn2 - chloride channel 2, Nlgn2 - neuroligin 2, Fscn1 - fascin homolog 1, actin bundling protein (strongylocentrotus purpuratus), Drd1a - dopamine receptor d1a, Cldn5 - claudin 5, Slc1a3 - solute carrier family 1 (glial high affinity glutamate t…
	GO:0044463	cell projection part	1.19e-07	9.93e-06	1.52	11315	1080	1150	167	[Ptger3 - prostaglandin e receptor 3 (subtype ep3), Penk - preproenkephalin, Ptger4 - prostaglandin e receptor 4 (subtype ep4), Ar - androgen receptor, Clcn2 - chloride channel 2, Nlgn2 - neuroligin 2, Fscn1 - fascin homolog 1, actin bundling protein (strongylocentrotus purpuratus), Drd1a - dopamine receptor d1a, Cldn5 - claudin 5, Slc1a3 - solute carrier family 1 (glial high affinity glutamate t…
	GO:0034705	potassium channel complex	1.29e-07	1.03e-05	3.53	11315	74	1082	25	[Kcnq2 - potassium voltage-gated channel, subfamily q, member 2, Kcns1 - k+ voltage-gated channel, subfamily s, 1, Kcng1 - potassium voltage-gated channel, subfamily g, member 1, Snap25 - synaptosomal-associated protein 25, Abcc8 - atp-binding cassette, sub-family c (cftr/mrp), member 8, Cntnap2 - contactin associated protein-like 2, Kcna2 - potassium voltage-gated channel, shaker-related subfami…
	GO:0044297	cell body	1.61e-07	1.23e-05	1.77	11315	534	1150	96	[Shank2 - sh3/ankyrin domain gene 2, Ptger3 - prostaglandin e receptor 3 (subtype ep3), Penk - preproenkephalin, Ptger4 - prostaglandin e receptor 4 (subtype ep4), Nf2 - neurofibromatosis 2, Eno2 - enolase 2, gamma neuronal, Slc1a3 - solute carrier family 1 (glial high affinity glutamate transporter), member 3, Drd1a - dopamine receptor d1a, Cntnap2 - contactin associated protein-like 2, Slc6a3 -…
	GO:0042995	cell projection	2.03e-07	1.49e-05	1.43	11315	1434	1150	209	[Ptger3 - prostaglandin e receptor 3 (subtype ep3), Pip5kl1 - phosphatidylinositol-4-phosphate 5-kinase-like 1, Fscn1 - fascin homolog 1, actin bundling protein (strongylocentrotus purpuratus), Cntnap2 - contactin associated protein-like 2, Slc6a3 - solute carrier family 6 (neurotransmitter transporter, dopamine), member 3, Lrrc6 - leucine rich repeat containing 6 (testis), Tcp11 - t-complex prot…
	GO:0030424	axon	1.05e-06	7.39e-05	1.99	11315	297	1148	60	[Penk - preproenkephalin, Ar - androgen receptor, Nefh - neurofilament, heavy polypeptide, Drd1a - dopamine receptor d1a, Slc6a3 - solute carrier family 6 (neurotransmitter transporter, dopamine), member 3, Kcna2 - potassium voltage-gated channel, shaker-related subfamily, member 2, Robo3 - roundabout homolog 3 (drosophila), Lrrtm1 - leucine rich repeat transmembrane neuronal 1, Atp1a3 - atpase, …
	GO:0008076	voltage-gated potassium channel complex	1.12e-06	7.58e-05	3.49	11315	66	1082	22	[Kcnq2 - potassium voltage-gated channel, subfamily q, member 2, Kcns1 - k+ voltage-gated channel, subfamily s, 1, Kcng1 - potassium voltage-gated channel, subfamily g, member 1, Kcnh2 - potassium voltage-gated channel, subfamily h (eag-related), member 2, Kcng4 - potassium voltage-gated channel, subfamily g, member 4, Snap25 - synaptosomal-associated protein 25, Dpp10 - dipeptidylpeptidase 10, A…
	GO:0043025	neuronal cell body	1.16e-06	7.57e-05	1.76	11315	475	1150	85	[Shank2 - sh3/ankyrin domain gene 2, Ptger3 - prostaglandin e receptor 3 (subtype ep3), Penk - preproenkephalin, Ptger4 - prostaglandin e receptor 4 (subtype ep4), Eno2 - enolase 2, gamma neuronal, Drd1a - dopamine receptor d1a, Slc1a3 - solute carrier family 1 (glial high affinity glutamate transporter), member 3, Cntnap2 - contactin associated protein-like 2, Slc6a3 - solute carrier family 6 (n…
	GO:0042611	MHC protein complex	1.37e-06	8.58e-05	46.42	11315	5	195	4	[Mr1 - major histocompatibility complex, class i-related, B2m - beta-2 microglobulin, H2-DMa - histocompatibility 2, class ii, locus dma, H2-Eb1 - histocompatibility 2, class ii antigen e beta]
	GO:0098793	presynapse	1.37e-06	8.29e-05	2.38	11315	175	1058	39	[Penk - preproenkephalin, Hcn3 - hyperpolarization-activated, cyclic nucleotide-gated k+ 3, Snap91 - synaptosomal-associated protein 91, Snap25 - synaptosomal-associated protein 25, Sncg - synuclein, gamma, Drd1a - dopamine receptor d1a, Gabrb3 - gamma-aminobutyric acid (gaba) a receptor, subunit beta 3, Kcna2 - potassium voltage-gated channel, shaker-related subfamily, member 2, P2rx2 - purinerg…
	GO:0030054	cell junction	1.53e-06	8.99e-05	1.55	11315	833	1146	131	[Cldn13 - claudin 13, Nlgn2 - neuroligin 2, Cldn3 - claudin 3, Fscn1 - fascin homolog 1, actin bundling protein (strongylocentrotus purpuratus), Cldn5 - claudin 5, Cntnap2 - contactin associated protein-like 2, Svil - supervillin, Slc8a1 - solute carrier family 8 (sodium/calcium exchanger), member 1, Abcb4 - atp-binding cassette, sub-family b (mdr/tap), member 4, Kirrel - kin of irre like (drosop…
	GO:0045211	postsynaptic membrane	4.62e-06	0.000262	2.16	11315	207	1116	44	[Shank2 - sh3/ankyrin domain gene 2, Arrb1 - arrestin, beta 1, Snap91 - synaptosomal-associated protein 91, Homer1 - homer homolog 1 (drosophila), Gabra5 - gamma-aminobutyric acid (gaba) a receptor, subunit alpha 5, Nlgn2 - neuroligin 2, Kctd16 - potassium channel tetramerisation domain containing 16, Gabrr1 - gamma-aminobutyric acid (gaba) c receptor, subunit rho 1, Clstn2 - calsyntenin 2, Iqsec…
	GO:0031226	intrinsic component of plasma membrane	7.02e-06	0.000386	1.59	11315	670	1125	106	[Hcrtr2 - hypocretin (orexin) receptor 2, Slc5a11 - solute carrier family 5 (sodium/glucose cotransporter), member 11, Nlgn2 - neuroligin 2, Kcnj1 - potassium inwardly-rectifying channel, subfamily j, member 1, Slc1a3 - solute carrier family 1 (glial high affinity glutamate transporter), member 3, Drd1a - dopamine receptor d1a, Slc26a3 - solute carrier family 26, member 3, Slc8a1 - solute carrier…

## Sheet: compositePC BiologicalProcess
	GO Term	Description	P-value	FDR q-value	Enrichment	N	B	n	b	Genes
	GO:0060048	cardiac muscle contraction	1.4e-08	0.000197	5.86	11315	33	936	16	[Kcnh2 - potassium voltage-gated channel, subfamily h (eag-related), member 2, Atp1b1 - atpase, na+/k+ transporting, beta 1 polypeptide, Csrp3 - cysteine and glycine-rich protein 3, Dmd - dystrophin, muscular dystrophy, Slc8a1 - solute carrier family 8 (sodium/calcium exchanger), member 1, Casq2 - calsequestrin 2, Tnni1 - troponin i, skeletal, slow 1, Atp1a3 - atpase, na+/k+ transporting, alpha 3…
	GO:1903522	regulation of blood circulation	9.7e-08	0.00068	3.03	11315	112	1066	32	[Ptger3 - prostaglandin e receptor 3 (subtype ep3), Jak2 - janus kinase 2, Smtn - smoothelin, Atp1b1 - atpase, na+/k+ transporting, beta 1 polypeptide, Atp1a1 - atpase, na+/k+ transporting, alpha 1 polypeptide, Csrp3 - cysteine and glycine-rich protein 3, Dmd - dystrophin, muscular dystrophy, Atp2b4 - atpase, ca++ transporting, plasma membrane 4, Slc8a1 - solute carrier family 8 (sodium/calcium e…
	GO:0008016	regulation of heart contraction	2.36e-07	0.0011	2.99	11315	110	1066	31	[Jak2 - janus kinase 2, Smtn - smoothelin, Atp1b1 - atpase, na+/k+ transporting, beta 1 polypeptide, Atp1a1 - atpase, na+/k+ transporting, alpha 1 polypeptide, Csrp3 - cysteine and glycine-rich protein 3, Dmd - dystrophin, muscular dystrophy, Atp2b4 - atpase, ca++ transporting, plasma membrane 4, Slc8a1 - solute carrier family 8 (sodium/calcium exchanger), member 1, Trpm4 - transient receptor pot…
	GO:0051239	regulation of multicellular organismal process	3.57e-07	0.00125	1.43	11315	1446	1109	203	[Ptger3 - prostaglandin e receptor 3 (subtype ep3), Hcrtr2 - hypocretin (orexin) receptor 2, Ntrk1 - neurotrophic tyrosine kinase, receptor, type 1, Cyp2j5 - cytochrome p450, family 2, subfamily j, polypeptide 5, Ntrk3 - neurotrophic tyrosine kinase, receptor, type 3, Slc6a3 - solute carrier family 6 (neurotransmitter transporter, dopamine), member 3, Ace - angiotensin i converting enzyme (peptid…
	GO:0050801	ion homeostasis	5.2e-07	0.00146	2.01	11315	467	770	64	[Jak2 - janus kinase 2, Ptger3 - prostaglandin e receptor 3 (subtype ep3), Hcrtr2 - hypocretin (orexin) receptor 2, Trf - transferrin, Gpr65 - g-protein coupled receptor 65, Slc4a4 - solute carrier family 4 (anion exchanger), member 4, P2ry10 - purinergic receptor p2y, g-protein coupled 10, Slc8a1 - solute carrier family 8 (sodium/calcium exchanger), member 1, Ckb - creatine kinase, brain, Got1 -…
	GO:0044057	regulation of system process	7.42e-07	0.00174	1.96	11315	340	1106	65	[Ptger3 - prostaglandin e receptor 3 (subtype ep3), Jak2 - janus kinase 2, Smtn - smoothelin, Ahr - aryl-hydrocarbon receptor, Hgf - hepatocyte growth factor, Trf - transferrin, Cyp2j5 - cytochrome p450, family 2, subfamily j, polypeptide 5, Nlgn2 - neuroligin 2, Atp2b4 - atpase, ca++ transporting, plasma membrane 4, Slc8a1 - solute carrier family 8 (sodium/calcium exchanger), member 1, Mmp2 - ma…
	GO:0065008	regulation of biological quality	8.76e-07	0.00176	1.34	11315	2189	1022	265	[Ptger3 - prostaglandin e receptor 3 (subtype ep3), Hcrtr2 - hypocretin (orexin) receptor 2, Abcb7 - atp-binding cassette, sub-family b (mdr/tap), member 7, Slc25a28 - solute carrier family 25, member 28, Abhd5 - abhydrolase domain containing 5, Cyp2j5 - cytochrome p450, family 2, subfamily j, polypeptide 5, Spire1 - spire homolog 1 (drosophila), Slc6a3 - solute carrier family 6 (neurotransmitter…
	GO:0050727	regulation of inflammatory response	1.24e-06	0.00217	2.63	11315	151	940	33	[Ptger3 - prostaglandin e receptor 3 (subtype ep3), Jak2 - janus kinase 2, Hgf - hepatocyte growth factor, Ppara - peroxisome proliferator activated receptor alpha, Bst1 - bone marrow stromal cell antigen 1, Fabp4 - fatty acid binding protein 4, adipocyte, Il22ra2 - interleukin 22 receptor, alpha 2, Socs3 - suppressor of cytokine signaling 3, Wnt5a - wingless-related mmtv integration site 5a, Ser…
	GO:0098771	inorganic ion homeostasis	1.39e-06	0.00217	2	11315	448	770	61	[Ptger3 - prostaglandin e receptor 3 (subtype ep3), Jak2 - janus kinase 2, Hcrtr2 - hypocretin (orexin) receptor 2, Trf - transferrin, Gpr65 - g-protein coupled receptor 65, Slc4a4 - solute carrier family 4 (anion exchanger), member 4, P2ry10 - purinergic receptor p2y, g-protein coupled 10, Slc8a1 - solute carrier family 8 (sodium/calcium exchanger), member 1, Ckb - creatine kinase, brain, Atp1a3…
	GO:0019725	cellular homeostasis	1.84e-06	0.00258	1.95	11315	513	725	64	[Jak2 - janus kinase 2, Ptger3 - prostaglandin e receptor 3 (subtype ep3), Hcrtr2 - hypocretin (orexin) receptor 2, Trf - transferrin, Gpr65 - g-protein coupled receptor 65, Slc4a4 - solute carrier family 4 (anion exchanger), member 4, P2ry10 - purinergic receptor p2y, g-protein coupled 10, Slc8a1 - solute carrier family 8 (sodium/calcium exchanger), member 1, Ckb - creatine kinase, brain, P4hb -…
	GO:0055080	cation homeostasis	2.11e-06	0.00268	2	11315	434	770	59	[Ptger3 - prostaglandin e receptor 3 (subtype ep3), Jak2 - janus kinase 2, Hcrtr2 - hypocretin (orexin) receptor 2, Trf - transferrin, Gpr65 - g-protein coupled receptor 65, Slc4a4 - solute carrier family 4 (anion exchanger), member 4, P2ry10 - purinergic receptor p2y, g-protein coupled 10, Slc8a1 - solute carrier family 8 (sodium/calcium exchanger), member 1, Atp1a3 - atpase, na+/k+ transporting…
	GO:0006814	sodium ion transport	2.88e-06	0.00337	5.99	11315	89	276	13	[Slc5a11 - solute carrier family 5 (sodium/glucose cotransporter), member 11, Atp1b2 - atpase, na+/k+ transporting, beta 2 polypeptide, Atp1b1 - atpase, na+/k+ transporting, beta 1 polypeptide, Atp1a1 - atpase, na+/k+ transporting, alpha 1 polypeptide, Slc4a4 - solute carrier family 4 (anion exchanger), member 4, Kcnj1 - potassium inwardly-rectifying channel, subfamily j, member 1, Slc9a5 - solut…
	GO:0042592	homeostatic process	3.65e-06	0.00394	1.64	11315	914	770	102	[Ptger3 - prostaglandin e receptor 3 (subtype ep3), Aipl1 - aryl hydrocarbon receptor-interacting protein-like 1, Hcrtr2 - hypocretin (orexin) receptor 2, Kcnj1 - potassium inwardly-rectifying channel, subfamily j, member 1, Slc8a1 - solute carrier family 8 (sodium/calcium exchanger), member 1, Ckb - creatine kinase, brain, Aqp1 - aquaporin 1, Slc4a2 - solute carrier family 4 (anion exchanger), m…
	GO:0006941	striated muscle contraction	3.99e-06	0.004	4.1	11315	59	795	17	[Kcnh2 - potassium voltage-gated channel, subfamily h (eag-related), member 2, Ryr3 - ryanodine receptor 3, Atp1b1 - atpase, na+/k+ transporting, beta 1 polypeptide, Csrp3 - cysteine and glycine-rich protein 3, Casq2 - calsequestrin 2, Slc8a1 - solute carrier family 8 (sodium/calcium exchanger), member 1, Tnni1 - troponin i, skeletal, slow 1, Atp1a3 - atpase, na+/k+ transporting, alpha 3 polypept…
	GO:0006873	cellular ion homeostasis	4.45e-06	0.00416	2.06	11315	394	725	52	[Ptger3 - prostaglandin e receptor 3 (subtype ep3), Jak2 - janus kinase 2, Hcrtr2 - hypocretin (orexin) receptor 2, Trf - transferrin, Gpr65 - g-protein coupled receptor 65, Slc4a4 - solute carrier family 4 (anion exchanger), member 4, P2ry10 - purinergic receptor p2y, g-protein coupled 10, Slc8a1 - solute carrier family 8 (sodium/calcium exchanger), member 1, Ckb - creatine kinase, brain, Atp1a3…
	GO:0048002	antigen processing and presentation of peptide antigen	6.21e-06	0.00544	49.63	11315	16	57	4	[Mr1 - major histocompatibility complex, class i-related, Tapbp - tap binding protein, H2-DMa - histocompatibility 2, class ii, locus dma, H2-Eb1 - histocompatibility 2, class ii antigen e beta]
	GO:0006952	defense response	6.95e-06	0.00573	1.75	11315	433	1135	76	[Jak2 - janus kinase 2, Ptger3 - prostaglandin e receptor 3 (subtype ep3), Samhd1 - sam domain and hd domain, 1, Ifi44l - interferon-induced protein 44 like, Mr1 - major histocompatibility complex, class i-related, Il17re - interleukin 17 receptor e, Spire1 - spire homolog 1 (drosophila), Camk4 - calcium/calmodulin-dependent protein kinase iv, Il17ra - interleukin 17 receptor a, Elf3 - e74-like f…
	GO:0006955	immune response	9.63e-06	0.0075	1.89	11315	312	1135	59	[Jak2 - janus kinase 2, Il13ra2 - interleukin 13 receptor, alpha 2, Samhd1 - sam domain and hd domain, 1, Ifi44l - interferon-induced protein 44 like, Mr1 - major histocompatibility complex, class i-related, Cd3g - cd3 antigen, gamma polypeptide, Cblb - casitas b-lineage lymphoma b, Camk4 - calcium/calmodulin-dependent protein kinase iv, Apcs - serum amyloid p-component, Alcam - activated leukocy…

## Sheet: compositePC MolecularFunction
	GO Term	Description	P-value	FDR q-value	Enrichment	N	B	n	b	Genes
	GO:0017075	syntaxin-1 binding	1.42e-06	0.00576	7.5	11315	21	718	10	[Syp - synaptophysin, Syt4 - synaptotagmin iv, Stxbp5 - syntaxin binding protein 5 (tomosyn), Stxbp1 - syntaxin binding protein 1, Snap25 - synaptosomal-associated protein 25, Snph - syntaphilin, Lrrk2 - leucine-rich repeat kinase 2, Myo5a - myosin va, Cplx1 - complexin 1, Nsf - n-ethylmaleimide sensitive fusion protein]
	GO:0015081	sodium ion transmembrane transporter activity	8.58e-06	0.0174	3.25	11315	101	759	22	[Slc6a14 - solute carrier family 6 (neurotransmitter transporter), member 14, Slc5a11 - solute carrier family 5 (sodium/glucose cotransporter), member 11, Atp1b2 - atpase, na+/k+ transporting, beta 2 polypeptide, Atp1b1 - atpase, na+/k+ transporting, beta 1 polypeptide, Slc5a5 - solute carrier family 5 (sodium iodide symporter), member 5, Atp1a1 - atpase, na+/k+ transporting, alpha 1 polypeptide,…

## Sheet: compositePC CellularComponent
	GO Term	Description	P-value	FDR q-value	Enrichment	N	B	n	b	Genes
	GO:0044459	plasma membrane part	9.56e-14	1.68e-10	1.62	11315	1574	1148	258	[Cldn13 - claudin 13, Ptger3 - prostaglandin e receptor 3 (subtype ep3), Hcrtr2 - hypocretin (orexin) receptor 2, Ntrk1 - neurotrophic tyrosine kinase, receptor, type 1, Mr1 - major histocompatibility complex, class i-related, Mal - myelin and lymphocyte protein, t cell differentiation protein, Fat1 - fat tumor suppressor homolog 1 (drosophila), Ntrk3 - neurotrophic tyrosine kinase, receptor, typ…
	GO:0005886	plasma membrane	4.91e-13	4.32e-10	1.41	11315	2532	1145	362	[Ptger3 - prostaglandin e receptor 3 (subtype ep3), Cldn13 - claudin 13, Hcrtr2 - hypocretin (orexin) receptor 2, Pcdh20 - protocadherin 20, Ntrk1 - neurotrophic tyrosine kinase, receptor, type 1, Mr1 - major histocompatibility complex, class i-related, Mal - myelin and lymphocyte protein, t cell differentiation protein, Fat1 - fat tumor suppressor homolog 1 (drosophila), Spire1 - spire homolog 1…
	GO:0044425	membrane part	4.34e-09	2.54e-06	1.26	11315	3751	1148	478	[Cldn13 - claudin 13, Ptger3 - prostaglandin e receptor 3 (subtype ep3), Hcrtr2 - hypocretin (orexin) receptor 2, Mr1 - major histocompatibility complex, class i-related, Abcb7 - atp-binding cassette, sub-family b (mdr/tap), member 7, Cyp46a1 - cytochrome p450, family 46, subfamily a, polypeptide 1, Mal - myelin and lymphocyte protein, t cell differentiation protein, Slc25a28 - solute carrier fam…
	GO:0030054	cell junction	1.19e-08	5.22e-06	1.65	11315	833	1144	139	[Cldn13 - claudin 13, Cgnl1 - cingulin-like 1, Fat1 - fat tumor suppressor homolog 1 (drosophila), Nlgn2 - neuroligin 2, Cldn3 - claudin 3, Fscn1 - fascin homolog 1, actin bundling protein (strongylocentrotus purpuratus), Cldn5 - claudin 5, Svil - supervillin, Cdh24 - cadherin-like 24, Slc8a1 - solute carrier family 8 (sodium/calcium exchanger), member 1, App - amyloid beta (a4) precursor protein…
	GO:0044421	extracellular region part	1.33e-08	4.66e-06	1.62	11315	888	1145	146	[Capg - capping protein (actin filament), gelsolin-like, Tnn - tenascin n, Hbb-bs - hemoglobin, beta adult s chain, 2010005H15Rik - riken cdna 2010005h15 gene, Fbrs - fibrosin, Agr2 - anterior gradient 2, Ace - angiotensin i converting enzyme (peptidyl-dipeptidase a) 1, Aqp1 - aquaporin 1, Sost - sclerostin, Cpa6 - carboxypeptidase a6, App - amyloid beta (a4) precursor protein, Muc5b - mucin 5, s…
	GO:0005615	extracellular space	3.65e-08	1.07e-05	1.74	11315	632	1132	110	[Capg - capping protein (actin filament), gelsolin-like, Hbb-bs - hemoglobin, beta adult s chain, Fbrs - fibrosin, 2010005H15Rik - riken cdna 2010005h15 gene, Agr2 - anterior gradient 2, Ace - angiotensin i converting enzyme (peptidyl-dipeptidase a) 1, Sost - sclerostin, App - amyloid beta (a4) precursor protein, Muc5b - mucin 5, subtype b, tracheobronchial, Cpa6 - carboxypeptidase a6, Axl - axl …
	GO:0005576	extracellular region	4.34e-08	1.09e-05	1.67	11315	841	1006	125	[Tnn - tenascin n, Ovch2 - ovochymase 2, Adam23 - a disintegrin and metallopeptidase domain 23, Agr2 - anterior gradient 2, Ace - angiotensin i converting enzyme (peptidyl-dipeptidase a) 1, Cpa6 - carboxypeptidase a6, Ptgds - prostaglandin d2 synthase (brain), Fbln2 - fibulin 2, Papl - iron/zinc purple acid phospatase-like, Zg16 - zymogen granule protein 16, Pycard - pyd and card domain containin…
	GO:0016020	membrane	5.58e-08	1.23e-05	1.19	11315	4938	1148	596	[Cldn13 - claudin 13, Ptger3 - prostaglandin e receptor 3 (subtype ep3), Hcrtr2 - hypocretin (orexin) receptor 2, Mr1 - major histocompatibility complex, class i-related, Cyp46a1 - cytochrome p450, family 46, subfamily a, polypeptide 1, Abcb7 - atp-binding cassette, sub-family b (mdr/tap), member 7, Mal - myelin and lymphocyte protein, t cell differentiation protein, Slc25a28 - solute carrier fam…
	GO:0005911	cell-cell junction	2.63e-07	5.14e-05	2.03	11315	325	1100	64	[Cldn13 - claudin 13, Cgnl1 - cingulin-like 1, Cldn8 - claudin 8, Fat1 - fat tumor suppressor homolog 1 (drosophila), Gjd3 - gap junction protein, delta 3, Cldn3 - claudin 3, Tln2 - talin 2, Fscn1 - fascin homolog 1, actin bundling protein (strongylocentrotus purpuratus), Cldn5 - claudin 5, Sirt2 - sirtuin 2, Cdh24 - cadherin-like 24, Slc8a1 - solute carrier family 8 (sodium/calcium exchanger), m…
	GO:0031012	extracellular matrix	3.82e-07	6.71e-05	1.95	11315	344	1145	68	[Bcan - brevican, Tnn - tenascin n, Wnt2b - wingless related mmtv integration site 2b, Mmp2 - matrix metallopeptidase 2, Mmp16 - matrix metallopeptidase 16, 2010005H15Rik - riken cdna 2010005h15 gene, Wnt5a - wingless-related mmtv integration site 5a, Mmp13 - matrix metallopeptidase 13, P4hb - prolyl 4-hydroxylase, beta polypeptide, Apcs - serum amyloid p-component, Sost - sclerostin, Cpa6 - carb…
	GO:0033267	axon part	4.05e-07	6.47e-05	2.45	11315	206	918	41	[Snap91 - synaptosomal-associated protein 91, Snap25 - synaptosomal-associated protein 25, Snap23 - synaptosomal-associated protein 23, Limk1 - lim-domain containing, protein kinase, Cldn5 - claudin 5, Mapk8ip1 - mitogen-activated protein kinase 8 interacting protein 1, Sirt2 - sirtuin 2, Tnn - tenascin n, Slc1a2 - solute carrier family 1 (glial high affinity glutamate transporter), member 2, Kcn…
	GO:0030424	axon	4.41e-07	6.47e-05	2.09	11315	297	1038	57	[Ar - androgen receptor, Ntrk1 - neurotrophic tyrosine kinase, receptor, type 1, Nefh - neurofilament, heavy polypeptide, Slc1a2 - solute carrier family 1 (glial high affinity glutamate transporter), member 2, Slc6a3 - solute carrier family 6 (neurotransmitter transporter, dopamine), member 3, Kcna2 - potassium voltage-gated channel, shaker-related subfamily, member 2, Kcna1 - potassium voltage-g…
	GO:0098590	plasma membrane region	5.65e-07	7.64e-05	1.63	11315	710	1145	117	[Ptger3 - prostaglandin e receptor 3 (subtype ep3), Mal - myelin and lymphocyte protein, t cell differentiation protein, Fat1 - fat tumor suppressor homolog 1 (drosophila), Nlgn2 - neuroligin 2, Cldn3 - claudin 3, Fscn1 - fascin homolog 1, actin bundling protein (strongylocentrotus purpuratus), Cldn5 - claudin 5, Atp2b4 - atpase, ca++ transporting, plasma membrane 4, Slc1a2 - solute carrier famil…
	GO:0005578	proteinaceous extracellular matrix	5.74e-07	7.2e-05	2.23	11315	236	1030	48	[Col17a1 - collagen, type xvii, alpha 1, Lingo3 - leucine rich repeat and ig domain containing 3, Col2a1 - collagen, type ii, alpha 1, Bcan - brevican, Lamc2 - laminin, gamma 2, Prss34 - protease, serine, 34, Col4a4 - collagen, type iv, alpha 4, Col4a3 - collagen, type iv, alpha 3, Tnn - tenascin n, Wnt2b - wingless related mmtv integration site 2b, Mmp2 - matrix metallopeptidase 2, Adamtsl4 - ad…
	GO:0098857	membrane microdomain	8.26e-07	9.68e-05	2.12	11315	242	1145	52	[Jak2 - janus kinase 2, Nf2 - neurofibromatosis 2, Mal - myelin and lymphocyte protein, t cell differentiation protein, Cblb - casitas b-lineage lymphoma b, Eno2 - enolase 2, gamma neuronal, Gpm6b - glycoprotein m6b, Slc6a3 - solute carrier family 6 (neurotransmitter transporter, dopamine), member 3, Gabbr1 - gamma-aminobutyric acid (gaba) b receptor, 1, Aqp1 - aquaporin 1, Slc6a2 - solute carrie…
	GO:0045121	membrane raft	8.26e-07	9.07e-05	2.12	11315	242	1145	52	[Jak2 - janus kinase 2, Nf2 - neurofibromatosis 2, Mal - myelin and lymphocyte protein, t cell differentiation protein, Cblb - casitas b-lineage lymphoma b, Eno2 - enolase 2, gamma neuronal, Gpm6b - glycoprotein m6b, Slc6a3 - solute carrier family 6 (neurotransmitter transporter, dopamine), member 3, Gabbr1 - gamma-aminobutyric acid (gaba) b receptor, 1, Aqp1 - aquaporin 1, Slc6a2 - solute carrie…
	GO:0042611	MHC protein complex	8.9e-07	9.2e-05	52.63	11315	5	172	4	[Mr1 - major histocompatibility complex, class i-related, B2m - beta-2 microglobulin, H2-DMa - histocompatibility 2, class ii, locus dma, H2-Eb1 - histocompatibility 2, class ii antigen e beta]
	GO:0031224	intrinsic component of membrane	2.34e-06	0.000229	1.25	11315	2908	1148	370	[Ptger3 - prostaglandin e receptor 3 (subtype ep3), Cldn13 - claudin 13, Hcrtr2 - hypocretin (orexin) receptor 2, Pcdh20 - protocadherin 20, Ntrk1 - neurotrophic tyrosine kinase, receptor, type 1, Mr1 - major histocompatibility complex, class i-related, Mal - myelin and lymphocyte protein, t cell differentiation protein, Abcb7 - atp-binding cassette, sub-family b (mdr/tap), member 7, Cyp46a1 - cy…
	GO:0098589	membrane region	2.72e-06	0.000252	1.96	11315	292	1145	58	[Jak2 - janus kinase 2, Nf2 - neurofibromatosis 2, Mal - myelin and lymphocyte protein, t cell differentiation protein, Trf - transferrin, Ap2s1 - adaptor-related protein complex 2, sigma 1 subunit, Cblb - casitas b-lineage lymphoma b, Eno2 - enolase 2, gamma neuronal, Gpm6b - glycoprotein m6b, Slc6a3 - solute carrier family 6 (neurotransmitter transporter, dopamine), member 3, Gabbr1 - gamma-ami…
