# Supplementary figures and images for: Predominance of cis-regulatory changes in parallel expression divergence of sticklebacks
Source: eLife journal article supplement (doi:10.7554/elife.43785), 2019-05-15

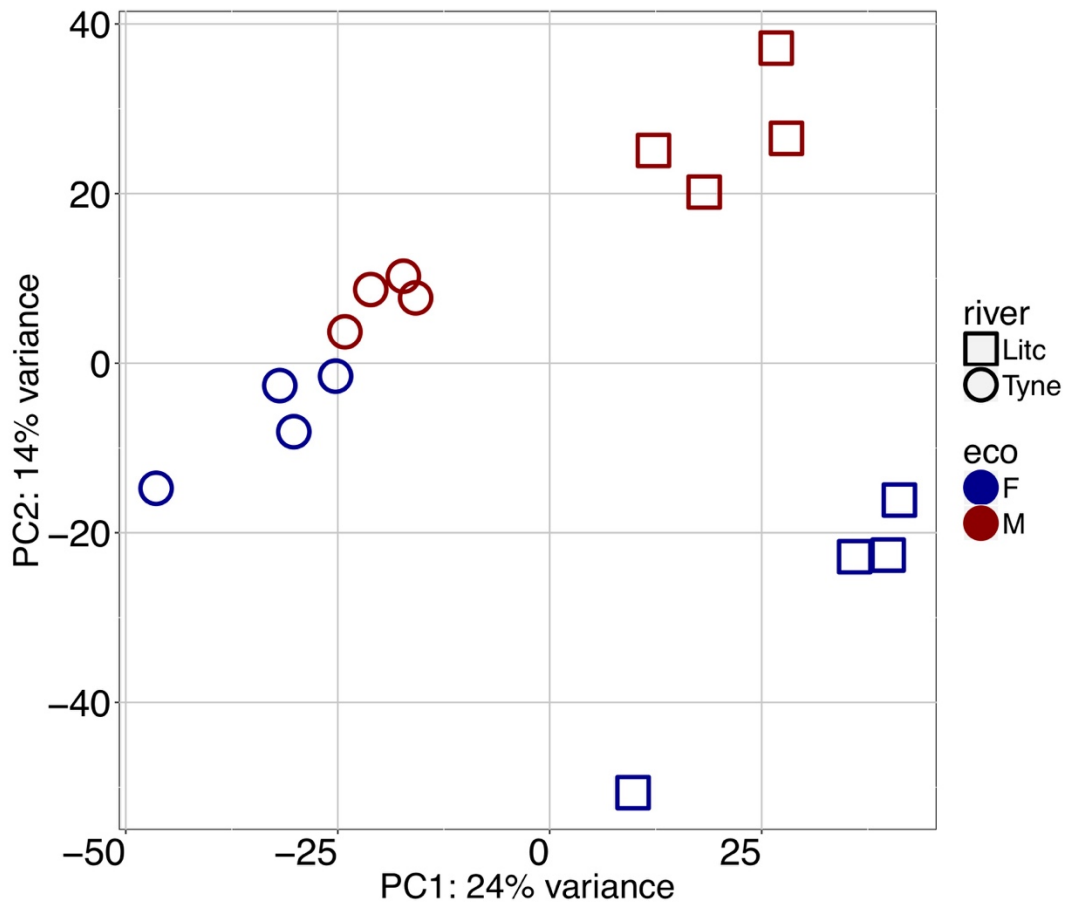

Supplement: supp [file elife-43785-supp-v1.zip]

Reference-guided Gill Transcriptome Assembly  
(29295 XLOCS, 171620 TCONS)

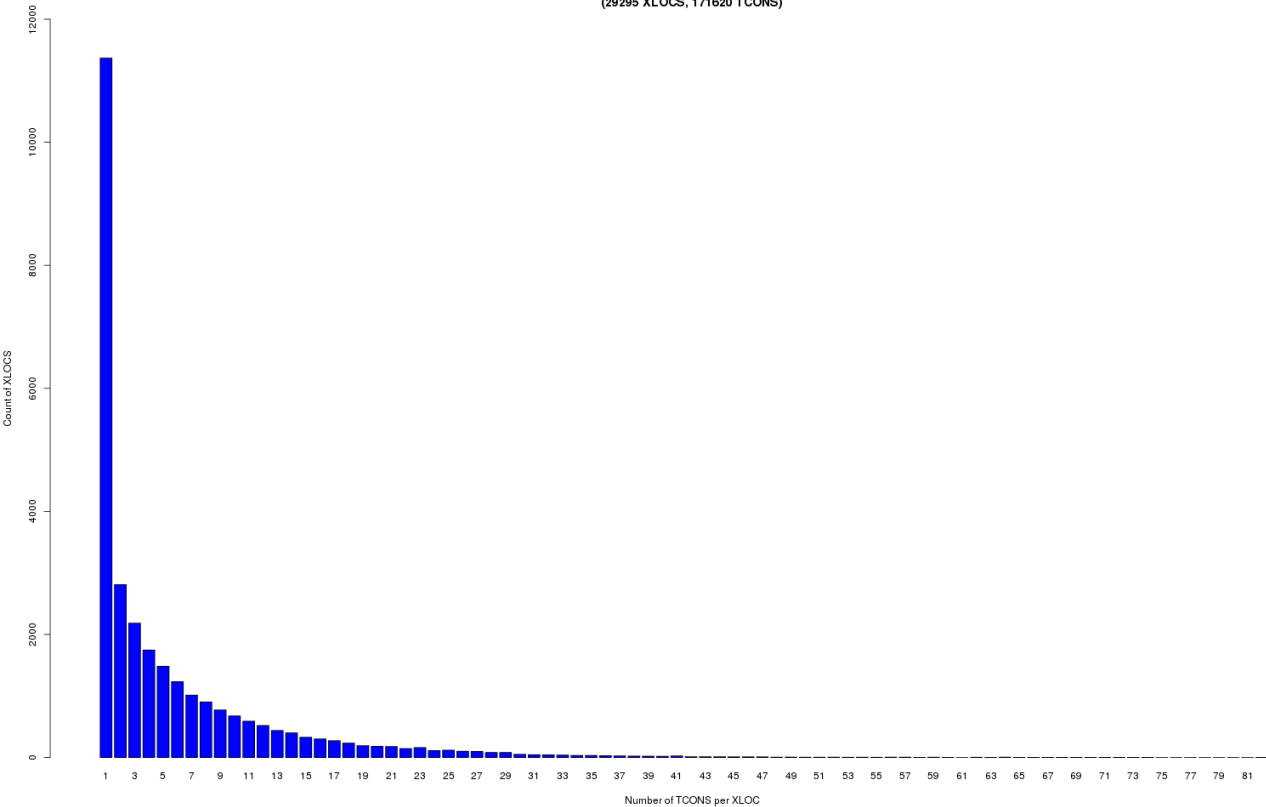

Supplement: supp [file elife-43785-supp-v1.zip]

**a** $R^2=0.37$ 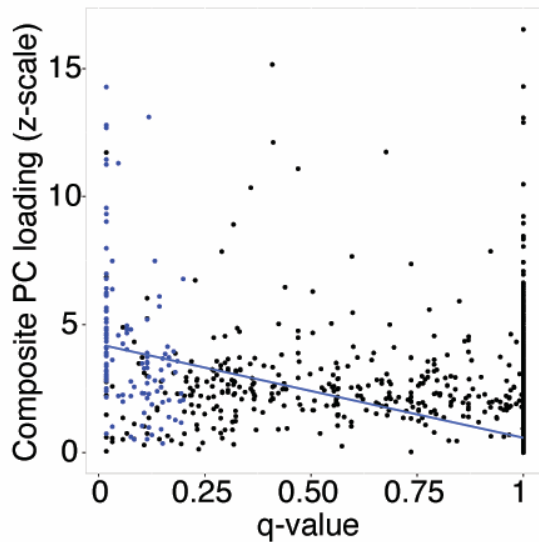**b**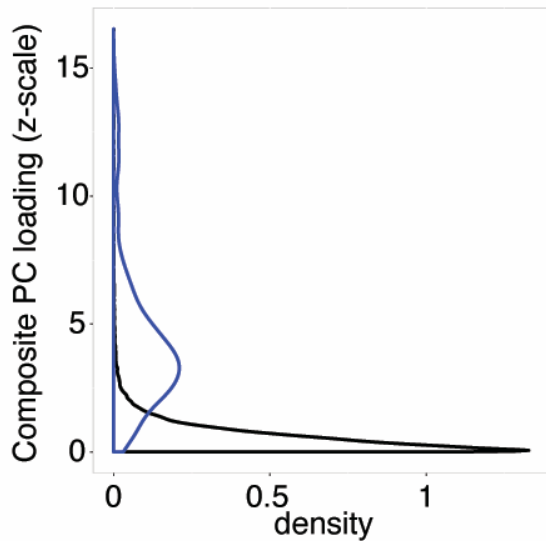**c**

1% PCA outliers      Cufflinks ( $N_{\text{eco}}=8$ )

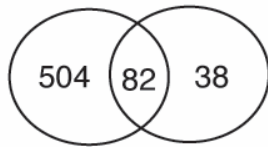

Supplement: supp [file elife-43785-supp-v1.zip]

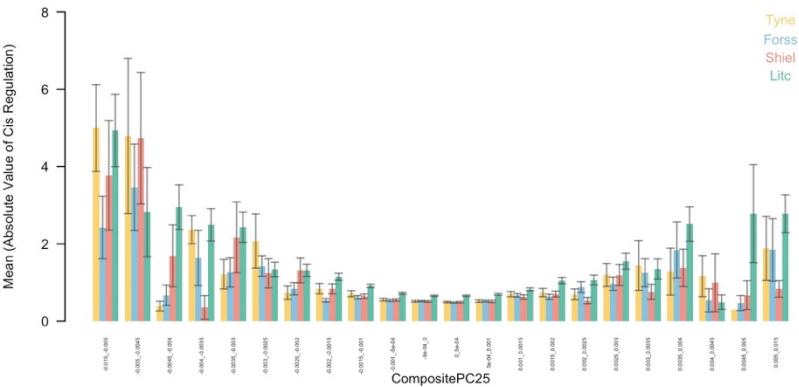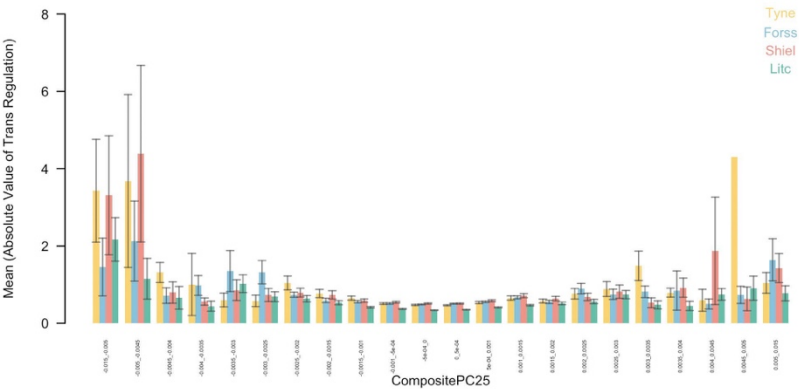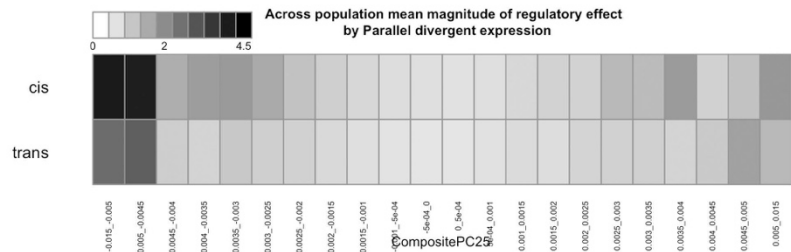

Supplement: supp [file elife-43785-supp-v1.zip]

PC2 (18.4%)

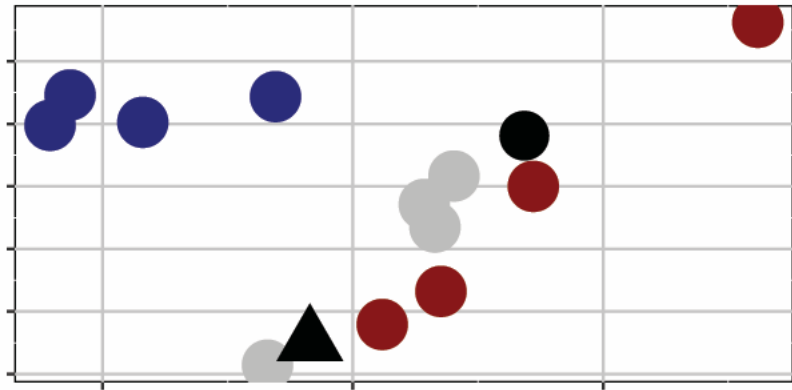

PC1 (72.8%)

F1's

0.2 ppt

35 ppt

3.5 ppt

parents

Female

Male

Supplement: supp [file elife-43785-supp-v1.zip]

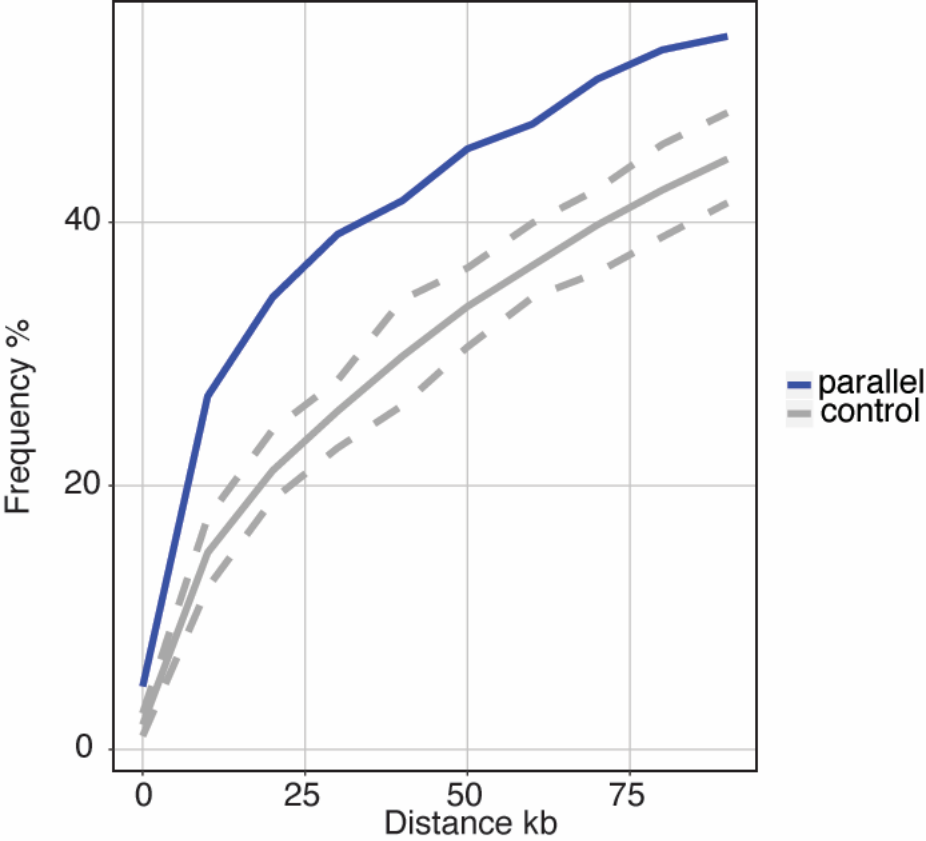

Supplement: supp [file elife-43785-supp-v1.zip]

**a**

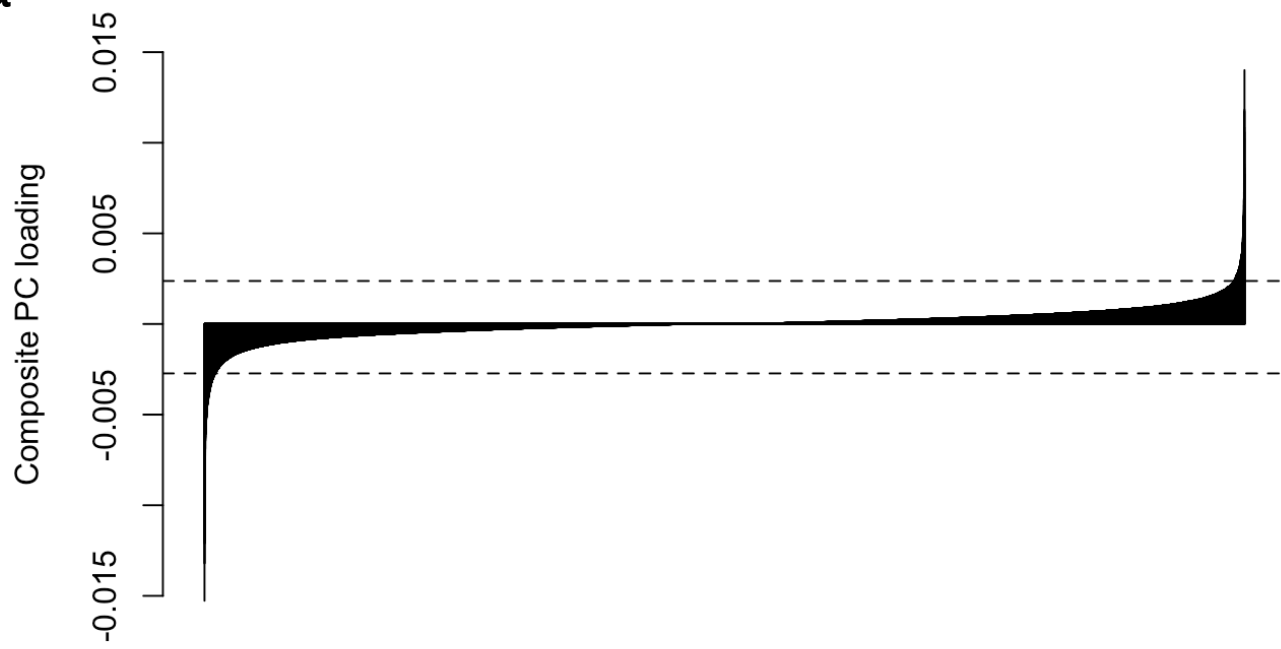

**b**

**Distribution of FDR values**

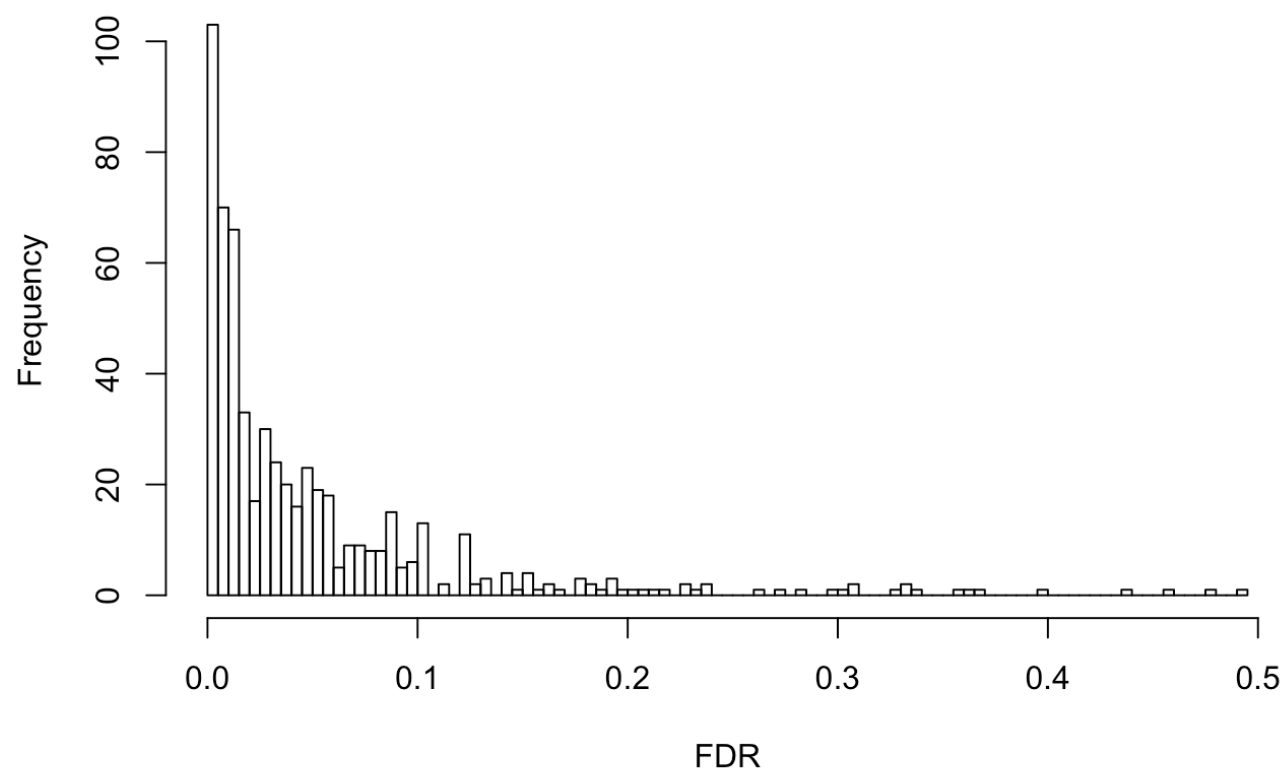

Supplement: supp [file elife-43785-supp-v1.zip]

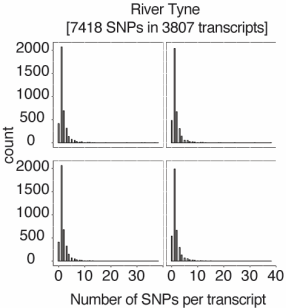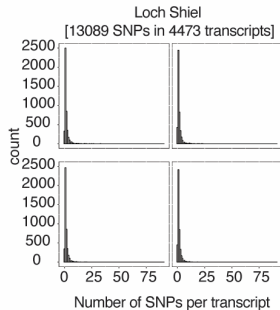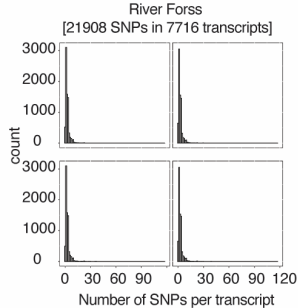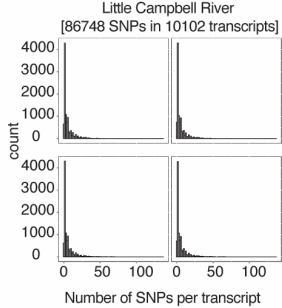

Supplement: supp [file elife-43785-supp-v1.zip]

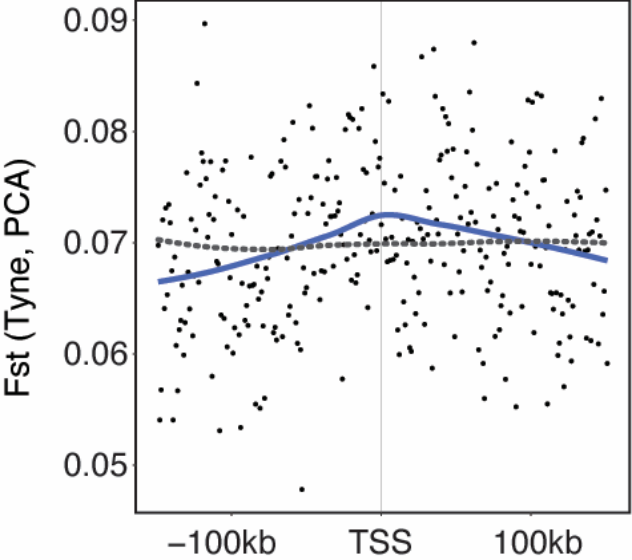

Supplement: supp [file elife-43785-supp-v1.zip]

Fst (Litc, parametric)

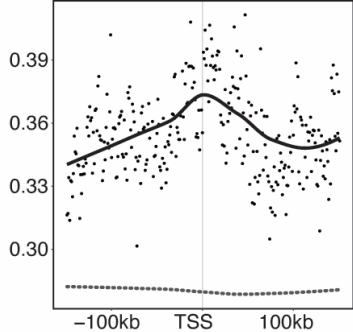

Pi (Litc marine, parametric)

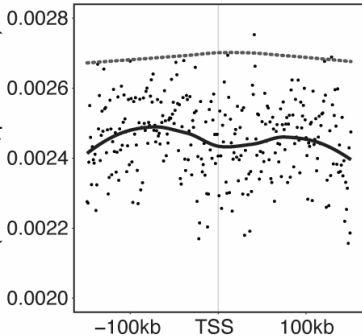

Pi (Litc freshwater, parametric)

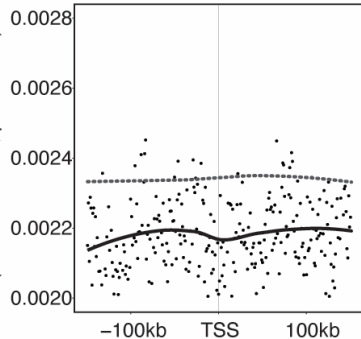

Supplement: supp [file elife-43785-supp-v1.zip]

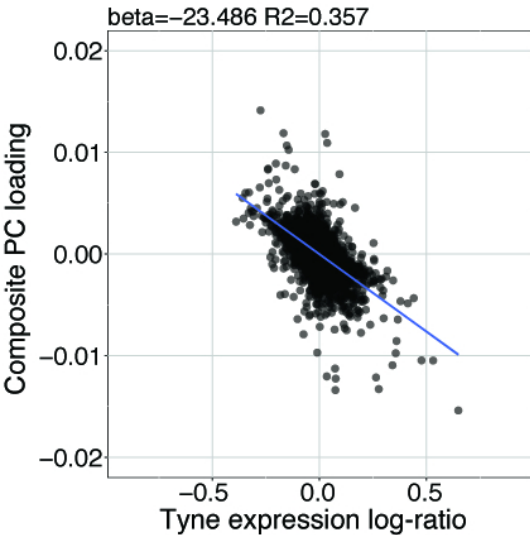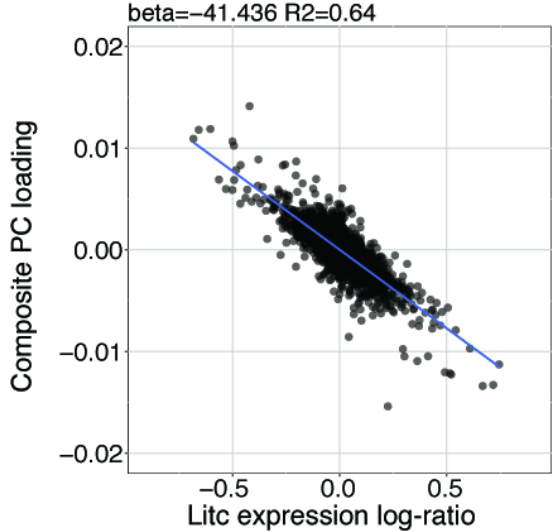

Supplement: supp [file elife-43785-supp-v1.zip]

River Tyne

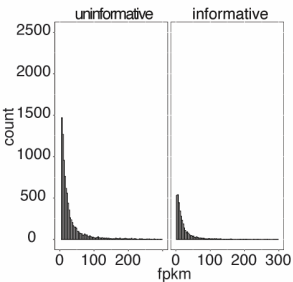

Loch Shiel

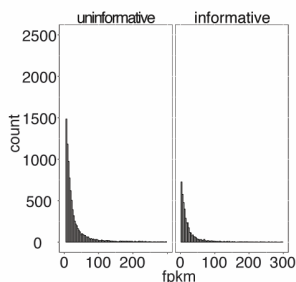

River Forss

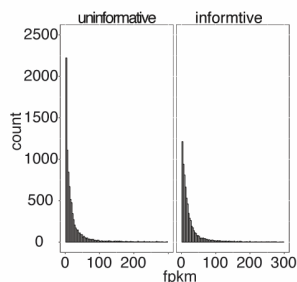

Little Campbell River

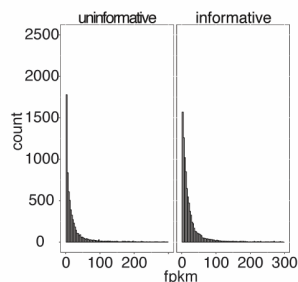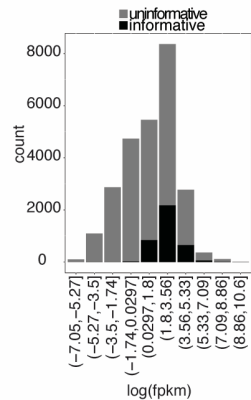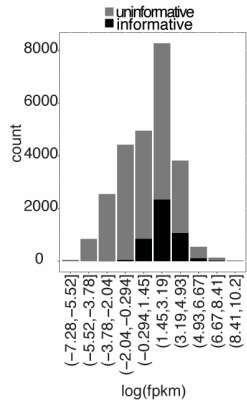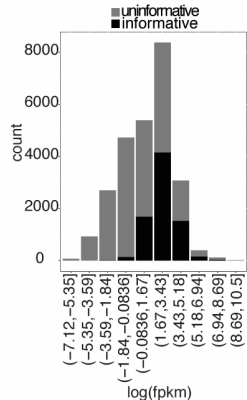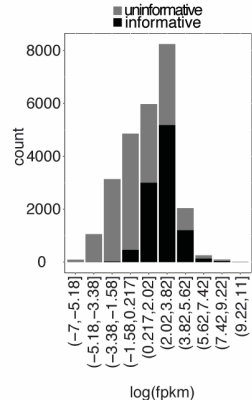

Supplement: supp [file elife-43785-supp-v1.zip]

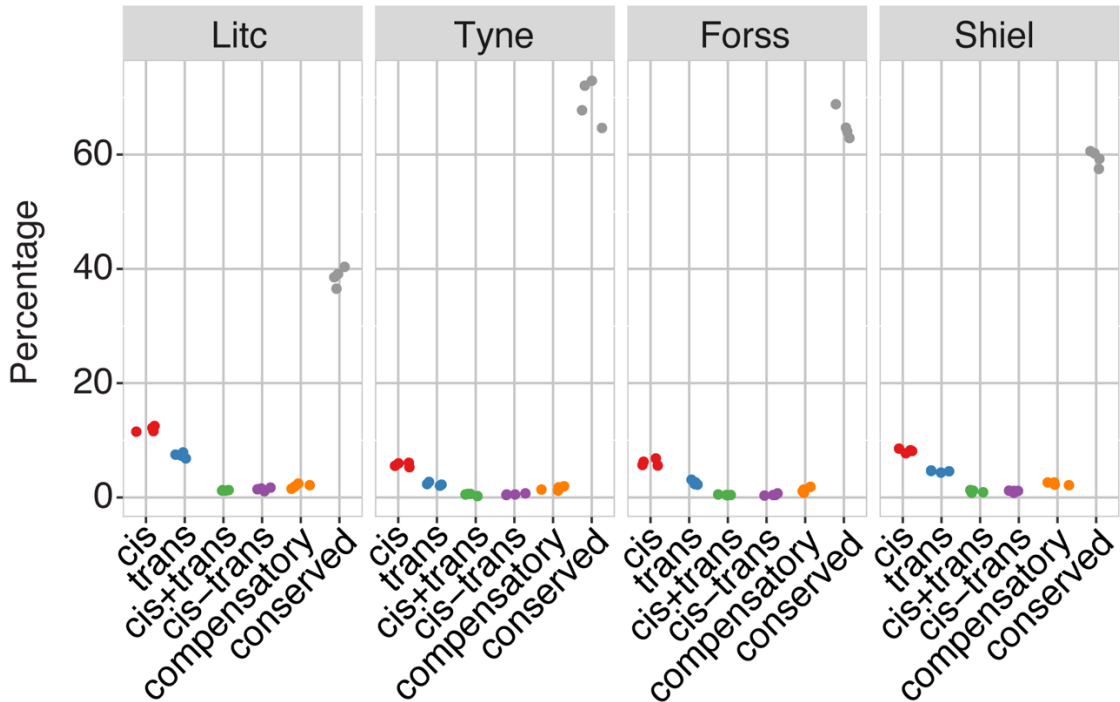

Supplement: supp [file elife-43785-supp-v1.zip]
